1 **Calm on the surface, dynamic on the inside. Molecular homeostasis in response to regulatory and**  
2 **metabolic perturbation of *Anabaena* sp. PCC 7120 nitrogen metabolism**

3  
4 Giorgio Perin<sup>1</sup>, Tyler Fletcher<sup>2</sup>, Virag Sagi-Kiss<sup>3</sup>, David C. A. Gaboriau<sup>4</sup>, Mathew R. Carey<sup>3</sup>, Jacob G.  
5 Bundy<sup>3</sup>, Patrik R. Jones<sup>1\*</sup>

- 6  
7 1. Department of Life Sciences, Imperial College London, London, UK  
8 2. Complex Carbohydrate Research Center and Department of Chemistry, University of  
9 Georgia, Athens, Georgia, USA  
10 3. Department of Metabolism, Digestion and Reproduction, Imperial College London, London,  
11 UK  
12 4. Facility for Imaging by Light Microscopy, NHLI, Imperial College London, London, UK  
13

14 \* Corresponding author. E-mail: [p.jones@imperial.ac.uk](mailto:p.jones@imperial.ac.uk)  
15  
16

17 **Abstract**

18 Nitrogen is a key macro-nutrient required for the metabolism and growth of biological systems.  
19 Although multiple nitrogen sources can serve this purpose, they are all converted into  
20 ammonium/ammonia as a first step of assimilation. It is thus reasonable to expect that molecular  
21 parts involved in the transport of ammonium/ammonia across biological membranes (i.e. catalysed  
22 by AMT transporters) connect with the regulation of both nitrogen and central carbon metabolism.  
23 In order to test this hypothesis, we applied both (1) genetic (i.e. *Δamt* mutation) and (2)  
24 environmental treatments to a target biological system, the cyanobacterium *Anabaena* sp. PCC  
25 7120. Cyanobacteria have a key role in the global nitrogen cycle and thus represent a useful model  
26 system. The aim was to both (1) perturb sensing and low-affinity uptake of ammonium/ammonia  
27 and (2) induce multiple inner N states, followed by targeted quantification of key proteins,  
28 metabolites and enzyme activities, with experiments intentionally designed over a longer time-scale  
29 than the available studies in literature. We observed that the absence of AMT transporters triggered  
30 a substantial response at a whole-system level, affecting enzyme activities and the quantity of both  
31 proteins and metabolites, spanning both N and C metabolism. Moreover, the absence of AMT  
32 transporters left a molecular fingerprint indicating N-deficiency even under N replete conditions (i.e.  
33 greater GS activity, lower 2-OG content and faster nitrogenase activation upon N deprivation).  
34 Contrasting with all of the above dynamic adaptations was the striking near-complete lack of any  
35 externally measurable phenotype (i.e. growth, photosynthesis, pigments, metabolites). We thus  
36 conclude that this species evolved a highly robust and adaptable molecular network to maintain  
37 homeostasis, resulting in substantial internal but minimal external perturbations. The analytical data  
38 highlights several internal adaptations, including increased N assimilation (i.e. greater GS activity)  
39 and nitrogenase activity (i.e. faster activation upon N deprivation) together with altered amino acids  
40 metabolism, as indicated by changes in Gln, Glu and 2-OG, indicating an altered C/N balance. The  
41 analyses provides evidence for an active role of AMT transporters in the regulatory/signalling  
42 network of N metabolism in this biological system, and the existence of a novel fourth IF7A-  
43 independent regulatory mechanism controlling GS activity.  
44

45 **Keywords**

46 *Anabaena sp. PCC 7120*; AMT transporters; Nitrogen metabolism; Systems biology; Homeostasis  
47 control

## 48 Introduction

49 Cyanobacteria are a group of morphologically diverse oxygenic photosynthetic bacteria (Singh &  
50 Montgomery, 2011) almost ubiquitous to every habitat on Earth, from hot springs to Antarctic rocks  
51 (Percival & Williams, 2013). They are often found as integral members of complex ecosystems  
52 representing all three domains of life (Adams & Duggan, 2008; Adams *et al*, 2013) where they  
53 contribute to whole ecosystem functionality by photosynthesis-driven assimilation of nutrients. One  
54 of the key nutrients they assimilate and provide to the (local) ecosystem is nitrogen (N), an essential  
55 building block for amino and nucleic acid biosynthesis. Cyanobacteria have a variety of  
56 complementary N assimilatory pathways, including ammonium [NH<sub>4</sub><sup>+</sup>, (Montesinos *et al*, 1998)],  
57 nitrate [NO<sub>3</sub><sup>-</sup>, (Omata *et al*, 1993)] nitrite [NO<sub>2</sub><sup>-</sup>, (Bird & Wyman, 2003)] and urea (Valladares *et al*,  
58 2002), and have a key role in the global nitrogen cycle (Flores & Herrero, 2005). Some genera even  
59 use amino acids [e.g. arginine and glutamine (Montesinos *et al*, 1997)] or directly fix atmospheric  
60 nitrogen [biological nitrogen fixation (BNF), (Herrero *et al*, 2001)], globally contributing 200 million  
61 tonnes of fixed N per year (Rascio & La Rocca, 2013). Cyanobacteria are also involved in symbiotic  
62 associations, with reduced carbon delivered to cyanobacteria in order to sustain BNF (Backer *et al*,  
63 2018). An example of such symbiotic associations is the aquatic fern *Azolla caroliniana*, which  
64 receives fixed N from a filamentous cyanobacterium (*Anabaena azollae*) hosted in the ovoid cavities  
65 of the plant's leaves (Lechno-Yossef & Nierzwicki-Bauer, 2005).

66 In its free-living form, this cyanobacterium makes a significant contribution to the carbon  
67 and nitrogen economy of multiple ecosystems (Kellar & Goldman, 1979). *Anabaena sp. PCC 7120*  
68 (henceforth 7120) is an isolated strain showing high genome sequence similarity with *Anabaena*  
69 *azollae* and is commonly used as a model organism to investigate cyanobacterial N-fixation (Herrero  
70 *et al*, 2016). As nitrogenases are oxygen-sensitive, photosynthesis-driven BNF calls for spatial and/or  
71 temporal separation between the metabolic pathway fuelling energy/carbon inputs (i.e.  
72 photosynthesis) and N-fixation (Fig. 1). Under diazotrophic conditions, 7120 differentiates 5-10% of  
73 its cells into specialised N-fixing heterocysts, following a highly regulated developmental pattern  
74 [i.e. a single heterocyst every 10-20 cells (Kumar *et al*, 2010)]. Heterocysts undergo a deep metabolic  
75 and structural remodelling to enable efficient N fixation (Golden & Yoon, 1998). The oxygen-evolving  
76 photosystem II (PSII) is dismantled, carbon fixation is avoided, photorespiratory activity is increased  
77 during differentiation (Valladares *et al*, 2007) and cells are surrounded by a thicker cell envelope  
78 [through the deposition of two additional envelope layers, i.e. an inner glycolipids and an outer  
79 polysaccharides layer (Nicolaisen *et al*, 2009)] than the vegetative cells, providing the required  
80 microoxic environment for N fixation activity (Kumar *et al*, 2010)(Fig. 1).

81 Heterocysts and vegetative cells have complementary metabolism, with the former  
82 providing fixed nitrogen and the latter returning reduced carbon needed to sustain BNF (Malatinszky  
83 *et al*, 2017). This metabolic exchange and associated networks (summarised in Fig. 1) are most likely  
84 carefully coordinated in order to ensure organism-level homeostasis (Mullineaux *et al*, 2008). The  
85 question is, how does this molecular coordination take place?

86  
87

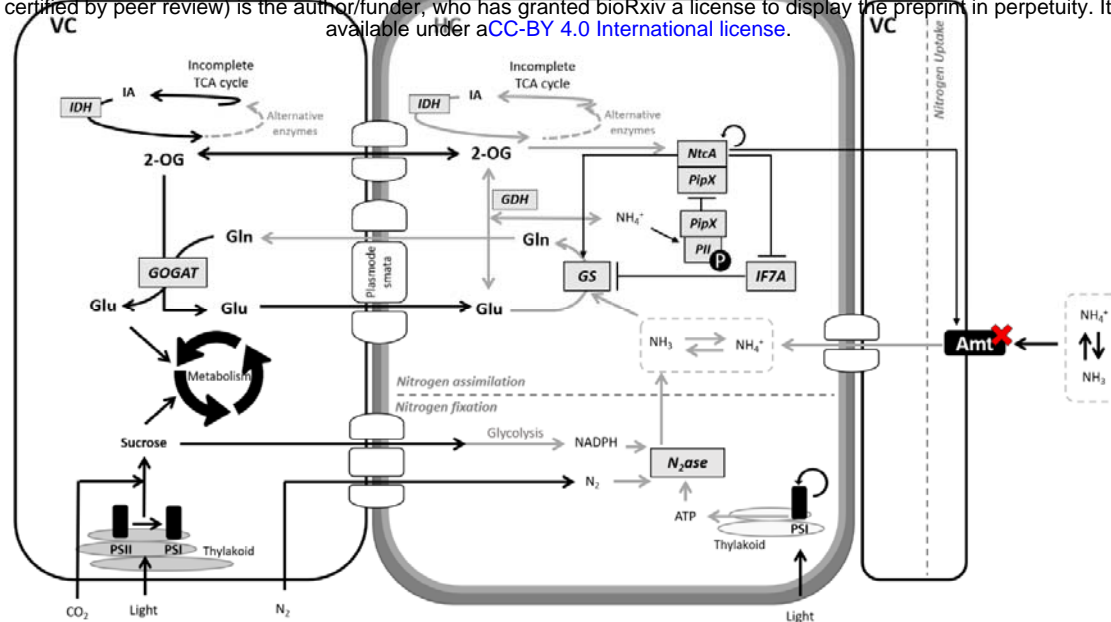

88

89 **Figure 1. Schematic overview of major molecular players regulating N metabolism and the metabolic**  
 90 **interaction between heterocysts (HC) and vegetative (VC) cells in *Anabaena sp. PCC 7120*, in diazotrophic**  
 91 **conditions.** Nitrogenase ( $N_2ase$ ) fixes one molecule of atmospheric  $N_2$  into two molecules of  $NH_3$  in heterocysts  
 92 (Inomura *et al*, 2017), using reducing power (NADPH) from the catabolism of carbon -compounds (sucrose)  
 93 photosynthesised in vegetative cells (Cumino *et al*, 2007; Nürnberg *et al*, 2015) and energy (ATP) from the  
 94 residual photosynthetic activity in heterocysts [i.e. cyclic electron flow around photosystem I (PSI), (Cardona &  
 95 Magnuson, 2010)].  $NH_3$  is then assimilated through glutamine synthetase (GS) via the amidation of glutamate  
 96 (Glu) to glutamine (Gln) (Forchhammer & Selim, 2019). GS activity is controlled through posttranslational  
 97 inactivation (Bolay *et al*, 2018) by IF7A (Galmozzi *et al*, 2010). Glutamate dehydrogenase (GDH) marginally  
 98 contributes to the assimilation flux of fixed N, catalysing the reversible conversion of 2-oxoglutarate (2-OG) to  
 99 Glu. Subsequently, in vegetative cells (Martín-Figueroa *et al*, 2000), glutamine oxoglutarate aminotransferase  
 100 (GOGAT) catalyses the transfer of the amine group from Gln to 2-OG, generating two molecules of Glu. As N  
 101 metabolism spans different cell types, a coordinated exchange of metabolites (i.e. sucrose, Gln, Glu and 2-OG)  
 102 between vegetative cells and heterocysts via septal junctions [plasmodesmata (Mullineaux *et al*, 2008)] is  
 103 required to maintain metabolic homeostasis. 2-OG is also a metabolic intermediate of the tricarboxylic acid  
 104 (TCA) cycle [synthesised from isocitric acid (IA) by isocitrate dehydrogenase (IDH)], thus connecting N and C  
 105 metabolism at a central point. N metabolism homeostasis is controlled by a molecular network, including the  
 106 proteins NtcA, PipX and PII. When external N is available, PII is not phosphorylated and it sequesters PipX,  
 107 preventing its binding to NtcA and consequently its activation. When N is limiting, PII is phosphorylated, freeing  
 108 PipX, which ultimately binds and activates NtcA (Flores & Herrero, 2005). The red cross indicates the knock-out  
 109 (KO) mutant  $\Delta amt$  used in this work (Paz-Yepes *et al*, 2008). Major molecular players targeted in this work are  
 110 highlighted by a grey square or in bold, respectively for proteins and metabolites.

111

112

113 In many organisms, including 7120, N metabolism is orchestrated by a complex signalling network  
 114 with the likely aim to balance the cellular C/N ratio (Forchhammer & Selim, 2019). N and C  
 115 metabolism are in fact tightly coupled as (1) the two elements are the most abundant in living  
 116 organisms, calling for coordination to avoid metabolic inefficiencies, and (2) N assimilation depends  
 117 on the availability of C skeleton, with shortage or oversupply strongly affecting the metabolism of N  
 118 (Zhang *et al*, 2018). Therefore, a properly balanced N and C metabolism is necessary for optimal  
 119 growth and different levels of regulation exist to control uptake and assimilation efficiencies of both  
 120 chemical species. When the C source (i.e.  $CO_2$  in case of phototrophic metabolism) is not limiting,

121 the regulatory mechanisms controlling C/N balance depend on both the abundance and the nature  
122 of the N sources available to the cell. Although cyanobacteria can use multiple N sources, including  
123  $\text{NH}_4^+$ , intracellularly they are all converted to  $\text{NH}_4^+$ , the most reduced and energetically favourable N  
124 source (Robinson, 2017). Ammonia translocation across biological membranes is actively driven by  
125 AMT transporters that belong to a family of permeases widely distributed in living organisms (Javelle  
126 *et al*, 2007), or through passive diffusion if the external pH pushes the equilibrium towards the  
127 uncharged form ( $\text{NH}_3$ , ammonia). 7120 bears a gene cluster including three *amt* genes, namely  
128 *amt4*, *amt1* and *amtB* (Paz-Yepes *et al*, 2008). In this work, we used a knock-out (KO) mutant of the  
129 whole gene cluster in 7120 [henceforth  $\Delta\text{amt}$ , (Paz-Yepes *et al*, 2008)] to perturb both the sensing of  
130 external N and low-affinity uptake of  $\text{NH}_4^+$ , with the aim to investigate how a  $\text{N}_2$ -fixing  
131 cyanobacterium responds to perturbation of N-metabolism at a whole-system level. Although  
132 several genes and proteins in 7120 have been individually studied previously (Flores & Herrero,  
133 2005; Forchhammer & Selim, 2019), it is difficult to make over-arching conclusions on the regulatory  
134 system, also as cyanobacteria differ substantially relative to heterotrophic bacteria (Reitzer, 2003;  
135 Bolay *et al*, 2018). The aim of this work is also to enhance our understanding that contributes  
136 towards the practical goal of eventually rerouting N -metabolism for biotechnological purposes  
137 (Perin *et al*, 2019).  
138

139 **Results**

140 *Amt* transporters are not required to support growth of 7120 under constant laboratory conditions  
 141 but play a role in N metabolism

142 Phototrophic growth of 7120 WT and  $\Delta amt$  strains was carried out in media with different N sources  
 143 ( $\text{NO}_3^-$ ,  $\text{N}_2$  and  $\text{NH}_4^+$ ) at saturating  $\text{CO}_2$  (i.e. 1%), in order to avoid C limitation. Such conditions are  
 144 expected to vary the internal C/N balance by modifying the abundance and nature of the N source.  
 145 The  $\Delta amt$  mutant did not display any growth phenotype with respect to the parental strain,  
 146 regardless of the N source (Fig. 2A), confirming that the whole *amt* cluster is not necessary to  
 147 support growth of 7120 under the tested laboratory conditions (Paz-Yepes *et al*, 2008).

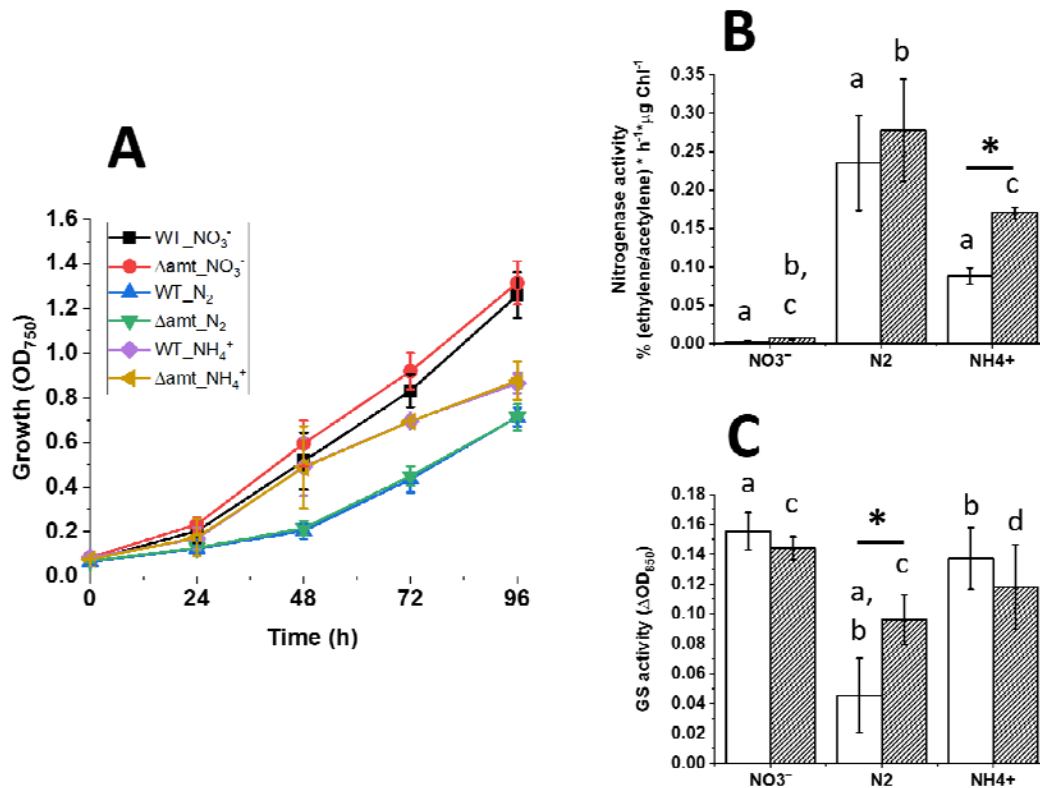

148 **Figure 2. Growth of 7120 WT and  $\Delta amt$  strains with different N sources.** The two strains were cultivated in  
 149 different N sources for 96 h. Growth (A) was monitored over the course of the whole experiment, whilst  
 150 Nitrogenase activity (B) and GS activity (C) were measured after 96 h in such cultivation conditions. Data are  
 151 indicated as average  $\pm$  SD of 6 biological replicates. Statistically significant differences between WT (white bars)  
 152 and  $\Delta amt$  (striped bars) are indicated with an asterisk, whilst the same alphabet letter indicates statistically  
 153 significant differences for the same strain in different growth conditions (one-way ANOVA,  $p$ -value < 0.05).

154

155

156 Growth in atmospheric  $\text{N}_2$  lags behind both  $\text{NO}_3^-$  and  $\text{NH}_4^+$ , with cells taking ~48 hours to fully switch  
 157 to atmospheric  $\text{N}_2$  fixation. Growth in  $\text{NH}_4^+$  shows two distinct modes, as indicated by the specific  
 158 growth rate (Supplementary Fig. S2), suggesting that 5 mM  $\text{NH}_4^+$  is not enough to support maximal  
 159 growth (i.e. growth in  $\text{NO}_3^-$  in this experiment) over the whole experimental time frame, and that it  
 160 likely runs out after ~48 hours (Fig. 2A). The nitrogenase activity, measured after 96 hours, confirms  
 161 that 5 mM  $\text{NH}_4^+$  runs out over the course of the experiment, triggering diazotrophic growth (Fig. 2B).

162 Moreover, the lower nitrogenase activity with respect to  $N_2$  conditions highlights that cells in  $NH_4^+$   
 163 media, at the time of sampling, are in a transitory phase before reaching the maximal N fixation  
 164 potential. Interestingly, in  $NH_4^+$  media, the  $\Delta amt$  strain shows a higher nitrogenase activity per unit  
 165 of chlorophyll (Chl) than the parental strain, although that does not result in an improvement in  
 166 growth, suggesting possible compensatory modifications in the following metabolic steps (e.g. N  
 167 assimilation). After 96 h, GS activity, a (supposed) central player in N metabolism in this organism  
 168 (Bolay *et al*, 2018), is also affected by the mutation (as in the case of fully diazotrophic conditions  
 169 ( $N_2$ ) in which  $\Delta amt$  strain shows a greater N assimilation activity than the WT, see Fig. 2C).  
 170 Moreover, when both strains are grown in  $N_2$ , GS activity is overall lower than in the other two  
 171 growth conditions. The collective data indicated that the loss of AMT resulted in no phenotypic  
 172 change, but that N-metabolism had adjusted, presumably to maintain homeostasis, raising the  
 173 following question: how extensive was this adaption and what molecular players were involved?  
 174

175 In 7120, GS is regulated both transcriptionally and post-translationally, according to the C/N status  
 176 of the cell (Bolay *et al*, 2018). The abundance of the protein is transcriptionally controlled and  
 177 changes according to the N source(s) as observed in the WT strain, but not in  $\Delta amt$  (Fig. 3A).  
 178  
 179

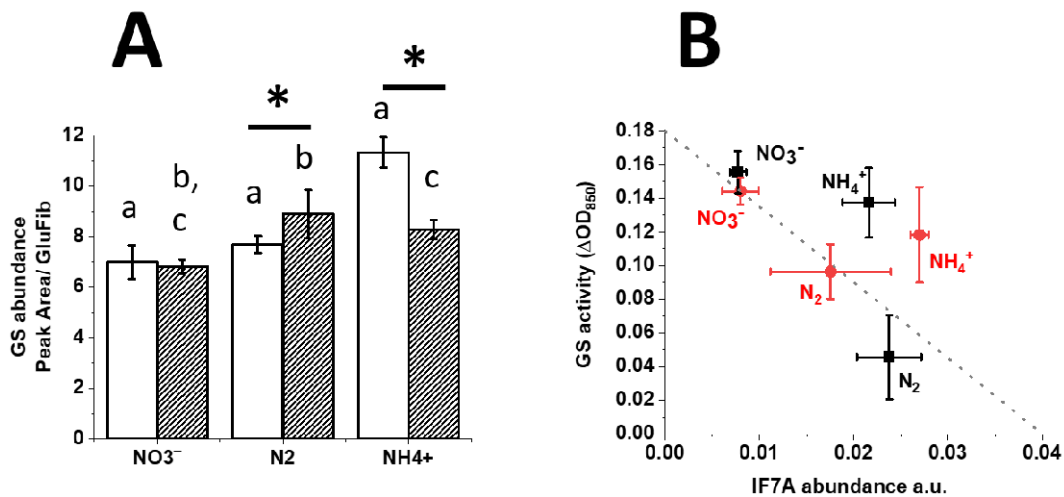

180 **Figure 3. GS abundance and correlation between GS activity and IF7A amount for 7120 WT and  $\Delta amt$  strains,**  
 181 **after 96 h in the growth conditions of figure 2A.** IF7A quantification data are reported in supplementary Fig.  
 182 S3. Data are indicated as average  $\pm$  SD of 6 biological replicates. *Statistically significant differences between WT*  
 183 *(white bars and black squares) and  $\Delta amt$  (striped bars and red circles) are indicated with an asterisk, whilst the*  
 184 *same alphabet letter indicates statistically significant differences for the same strain in different growth*  
 185 *conditions (one-way ANOVA, p-value < 0.05).*  
 186  
 187

188 The abundance of GS (Fig. 3A) does not reflect its measured activity (Fig. 2C). GS activity is known to  
 189 be controlled by covalent binding of the inactivation factor IF7A, in response to the C/N balance of  
 190 the cell (Galmozzi *et al*, 2010). As shown in Fig. 3B, in the WT strain, GS activity broadly displays a  
 191 negative correlation with the amount of the inactivation factor IF7A, as expected. There is no linear  
 192 correlation for either of the strains across different N sources, however, suggesting other molecular

193 players also contribute to the regulation of GS activity in this organism. The absence of AMT  
 194 transporters has an effect on the IF7A/GS activity relationship (Fig. 3B). In N replete conditions ( $\text{NO}_3^-$   
 195 ), there is no difference between the two strains, whilst under the two other N deplete  
 196 conditions, the deletion of *amt* results in a divergence between the two strains (Fig. 3B). The genetic and  
 197 environmental treatments affect GS activity through a combined variation in both GS and IF7A  
 198 abundance (Fig. 3A and supplementary Fig. S3). In particular, it is worth noting that  $\Delta amt$  retains GS  
 199 activity even if the amount of IF7A changes, supporting the idea that other regulatory players also  
 200 may be involved. Based on the available data, we hypothesised that AMT transporters are directly or  
 201 indirectly involved in the regulation of GS activity during the switch towards diazotrophic conditions  
 202 in 7120, as already observed in the purple bacterium *Rhodobacter capsulatus* (Yakunin & Hallenbeck,  
 203 2002).

204

#### 205 *Amt transporters regulate N metabolism homeostasis in 7120*

206 In order to test this hypothesis, the internal metabolic changes taking place in 7120 WT and  $\Delta amt$   
 207 during the transition from N replete to deplete conditions were followed by combining physiological  
 208 data with targeted proteomic and metabolomic quantification of molecular players known to be  
 209 involved in the regulation of N metabolism in 7120 (Fig. 1). Both WT and  $\Delta amt$  strains were  
 210 cultivated in BG11<sub>0</sub> supplemented with 5 mM  $\text{NH}_4^+$ . The concentration of ammonium/ammonia in  
 211 the media and cell growth was monitored over time (Fig. 4A). Four different time points were  
 212 chosen to investigate the physiological and metabolic status of the cells [i.e. NR (N replete  
 213 conditions), ND1, ND2 and ND4 (1, 2 and 4 days, respectively, after N depletion), corresponding to  
 214 24, 72, 96 and 144 h from the start of the experiment]. Former studies in 7120 mainly focused on  
 215 the first 24 h after N deprivation (Galmozzi *et al*, 2010; Valladares *et al*, 2011), as heterocyst  
 216 differentiation is expected to occur within such time frame (Valladares *et al*, 2011). Here, instead,  
 217 we opted for an extended sampling protocol in order to complement the information already  
 218 available in literature with the knowledge of the metabolic/proteomic adjustments happening over a  
 219 longer time-scale.

220

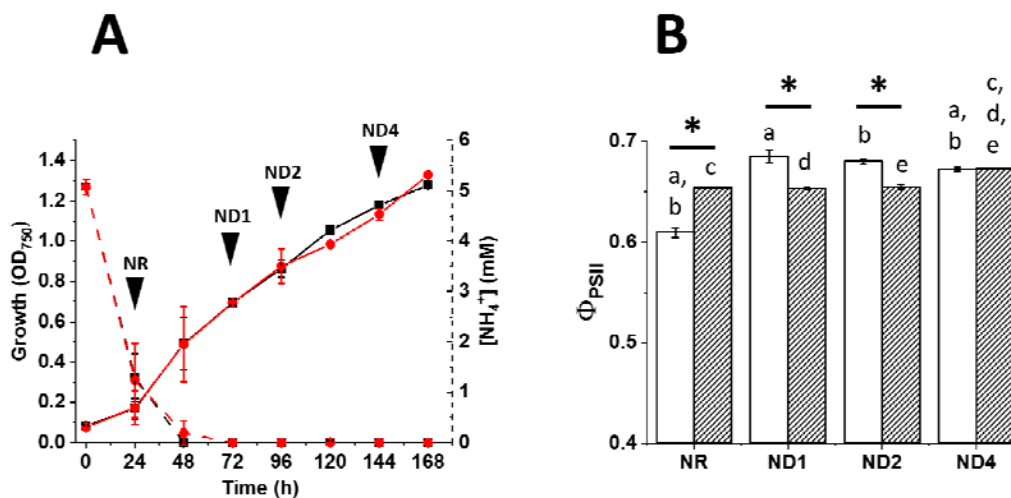

221 **Figure 4. Growth, ammonium/ammonia consumption (A) and maximal photosynthetic efficiency [( $\Phi_{\text{PsII}}$ ), (B)]**  
 222 **monitoring for 7120 WT and  $\Delta amt$  strains in BG11<sub>0</sub> + 5 mM  $\text{NH}_4^+$ .** In A., black and red dashed lines indicate  
 223 ammonium/ammonia concentration over time for 7120 WT and  $\Delta amt$  strains, respectively. Cultures were



224 sampled at four time points over the course of the experiment [NR (Nitrogen Replete), ND1, ND2 and ND4,  
 225 respectively 1, 2 and 4 days after Nitrogen Deprivation]. Data are indicated as average  $\pm$  SD of 6 biological  
 226 replicates. Statistically significant differences between WT (black squares and white bars) and  $\Delta$ amt (red circles  
 227 and striped bars) are indicated with an asterisk, whilst the same alphabet letter indicates statistically  
 228 significant differences for the same strain in different growth conditions (one-way ANOVA,  $p$ -value  $< 0.05$ ).

229  
 230

231 The absence of the whole *amt* cluster does not affect the ammonium/ammonia consumption rate,  
 232 indicating the diffusion of ammonia is enough to sustain growth in 7120, under the tested  
 233 experimental conditions (Fig. 4A). Moreover, ammonium/ammonia in the medium is fully depleted  
 234 after 48 h (Fig. 4A), confirming 5 mM  $\text{NH}_4^+$  is not enough to support maximal growth in 7120 over a  
 235 96 h-long experiment (Fig. 2A). Over the course of the experiment, both strains mostly showed a  
 236 stable pigment content, suggesting the switch towards diazotrophic conditions does not unbalance  
 237 the overall N status of the cell (Table 1).

238

239 **Table 1. Pigment content of WT and  $\Delta$ amt strains during the switch from N replete to deplete conditions.**  
 240 Cultures were sampled at four time points over the course of the experiment [NR (Nitrogen Replete), ND1, ND2  
 241 and ND4, respectively 1, 2 and 4 days after Nitrogen Deprivation], according to Fig. 4A. Data are indicated as  
 242 average  $\pm$  SD of 6 biological replicates. Statistically significant differences between WT and  $\Delta$ amt are indicated  
 243 with an asterisk, whilst the same alphabet letter indicates statistically significant differences for the same  
 244 strain in different growth conditions (one-way ANOVA,  $p$ -value  $< 0.05$ ).

245

| Chl content<br>( $\mu\text{g}/\text{OD}_{750}$ ) | WT                                  | $\Delta$ amt                      |
|--------------------------------------------------|-------------------------------------|-----------------------------------|
| NR                                               | 13.36 $\pm$ 0.49 <sup>a</sup>       | 14.14 $\pm$ 0.55 <sup>d</sup>     |
| ND1                                              | 13.41 $\pm$ 0.18 <sup>b</sup>       | 13.38 $\pm$ 0.41 <sup>e</sup>     |
| ND2                                              | 12.37 $\pm$ 0.37 <sup>*,a,b,c</sup> | 14.26 $\pm$ 0.27 <sup>*,e</sup>   |
| ND4                                              | 14.49 $\pm$ 0.72 <sup>*,c</sup>     | 16.13 $\pm$ 0.41 <sup>*,d,e</sup> |
| Car content<br>( $\mu\text{g}/\text{OD}_{750}$ ) |                                     |                                   |
| NR                                               | 5.78 $\pm$ 0.2 <sup>*,a</sup>       | 4.73 $\pm$ 0.22 <sup>*,c</sup>    |
| ND1                                              | 4.84 $\pm$ 0.05 <sup>a,b</sup>      | 4.7 $\pm$ 0.13 <sup>d</sup>       |
| ND2                                              | 4.49 $\pm$ 0.12 <sup>a,b</sup>      | 4.76 $\pm$ 0.11 <sup>e</sup>      |
| ND4                                              | 5.54 $\pm$ 0.29 <sup>b</sup>        | 5.86 $\pm$ 0.18 <sup>c,d,e</sup>  |

| Chl/Car |                               |                              |
|---------|-------------------------------|------------------------------|
| NR      | 2.31 ± 0.005 <sup>*,a</sup>   | 2.99 ± 0.02 <sup>*,c</sup>   |
| ND1     | 2.77 ± 0.01 <sup>*,a</sup>    | 2.85 ± 0.01 <sup>*,c,d</sup> |
| ND2     | 2.75 ± 0.01 <sup>*,b</sup>    | 2.99 ± 0.01 <sup>*,d</sup>   |
| ND4     | 2.61 ± 0.009 <sup>*,a,b</sup> | 2.75 ± 0.01 <sup>*,c,d</sup> |

246

247

248 However, the  $\Delta amt$  strain shows a greater Chl/Car ratio, mainly achieved through the accumulation  
249 of a higher Chl content than the parental strain (Table 1). This effect on the pigment composition has  
250 also a consequence on the photosynthetic performances. The photosynthetic activity in the parental  
251 strain changes over the course of the experiment, whilst in  $\Delta amt$  it is more stable (Fig. 4B).

252 Moreover, the mutant shows a higher photosynthetic efficiency than WT in N replete conditions,  
253 while the difference reverses both after 24 and 48 h under N deprivation conditions and ultimately  
254 disappears after 96 h (Fig. 4B). Given that the  $\Delta amt$  mutation does not trigger any growth  
255 phenotype, whilst there are substantial changes to both photosynthesis and N metabolism, we  
256 hypothesised that the deletion of the whole *amt* cluster is in fact triggering a whole cell metabolic  
257 response in order to maintain homeostasis.

258 In order to validate the two unanswered hypotheses, we investigated the N metabolism of  
259 7120 more closely, targeting the same proteins and enzymatic reactions as above, but this time  
260 measured in the same time intervals as indicated in Fig. 4A. Both WT and  $\Delta amt$  strains activate N  
261 fixation (Fig. 5A) as a consequence of ammonium/ammonia deprivation (Fig. 4A). The  $\Delta amt$  strain  
262 shows a higher nitrogenase activity than the parental strain in both ND1 and ND2, indicating a faster  
263 response to N deprivation than the parental strain (Fig. 5A). Abundance of NifK and NifD, encoding  
264 for  $\alpha$  and  $\beta$  subunits of nitrogenase, is higher in the mutant strain (Fig. 5B and 5C, respectively),  
265 suggesting increased N fixation activity depends at least in part on a greater accumulation of the  
266 protein complex, given also the number of heterocysts over the course of the experiment is not  
267 affected by the mutation (Supplementary Fig. S4). The increased N fixation activity does not  
268 translate to a greater growth rate in the mutant, however, suggesting possible compensatory  
269 modifications in downstream steps of N metabolism.

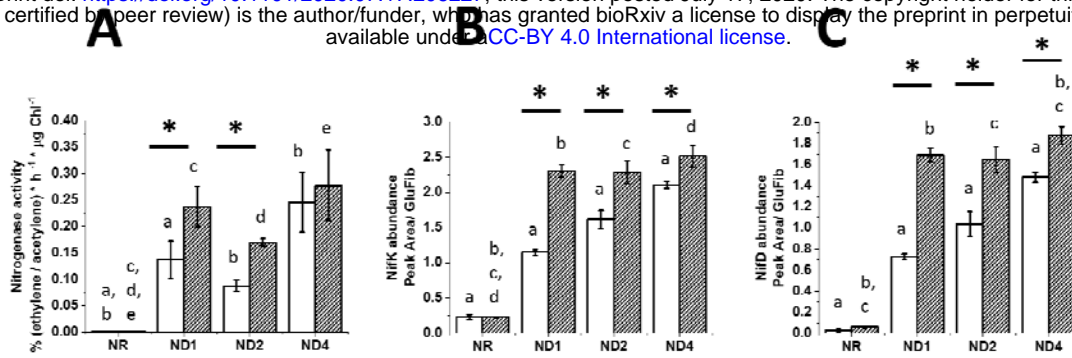

270 **Figure 5. Nitrogenase activity (A), NifK (B) and NifD (C) abundance in both WT and  $\Delta amt$  strains, following N**  
 271 **deprivation.** Time points are those indicated in Fig. 4A and correspond to NR (Nitrogen Replete), ND1, ND2 and  
 272 ND4, respectively 1, 2 and 4 days after Nitrogen Deprivation. Data are indicated as average  $\pm$  SD of 6 biological  
 273 replicates. Statistically significant differences between WT (white bars) and  $\Delta amt$  (striped bars) are indicated  
 274 with an asterisk, whilst the same alphabet letter indicates statistically significant differences for the same  
 275 strain in different growth conditions (one-way ANOVA,  $p$ -value  $< 0.05$ ).  
 276  
 277

278 Once atmospheric N is fixed into ammonium/ammonia, the latter is incorporated into amino acid  
 279 metabolism. GS activity was strongly regulated in both strains also in this experiment, as observed  
 280 before (Fig. 2B). In N replete conditions,  $\Delta amt$  showed greater N assimilation activity than the  
 281 parental strain (i.e. NR in Fig. 6A), likely to be the cause of the increased influx of N in the central  
 282 metabolism, as indicated by the increased pigment content and photosynthetic activity observed in  
 283 NR conditions (Table 1 and Fig. 4B). Consequently, GS activity was influenced by the change in N  
 284 metabolism, especially in the earlier samples. GS activity was at first reduced and then strongly  
 285 increased (i.e. ND1 and ND2 in fig. 6A), before stabilising again to the same rate observed under N  
 286 replete conditions (i.e. ND4 in fig. 6A). The trend in GS activity appeared to depend on the  
 287 abundance of both GS and IF7A (Fig. 6B and 6C, respectively), which accumulate differentially in the  
 288 two strains. The deletion of the whole *amt* cluster in fact strongly affects the abundance of both  
 289 proteins, which impacts the overall regulation of GS activity, possibly calling for other compensatory  
 290 mechanisms in this genetic background, as often GS activity is retained even though differences in  
 291 the amount of IF7A are present (Fig. 6D). These results strengthen the hypothesis that AMT  
 292 transporters play a direct or indirect IF7A-independent role on the GS activity in 7120.  
 293

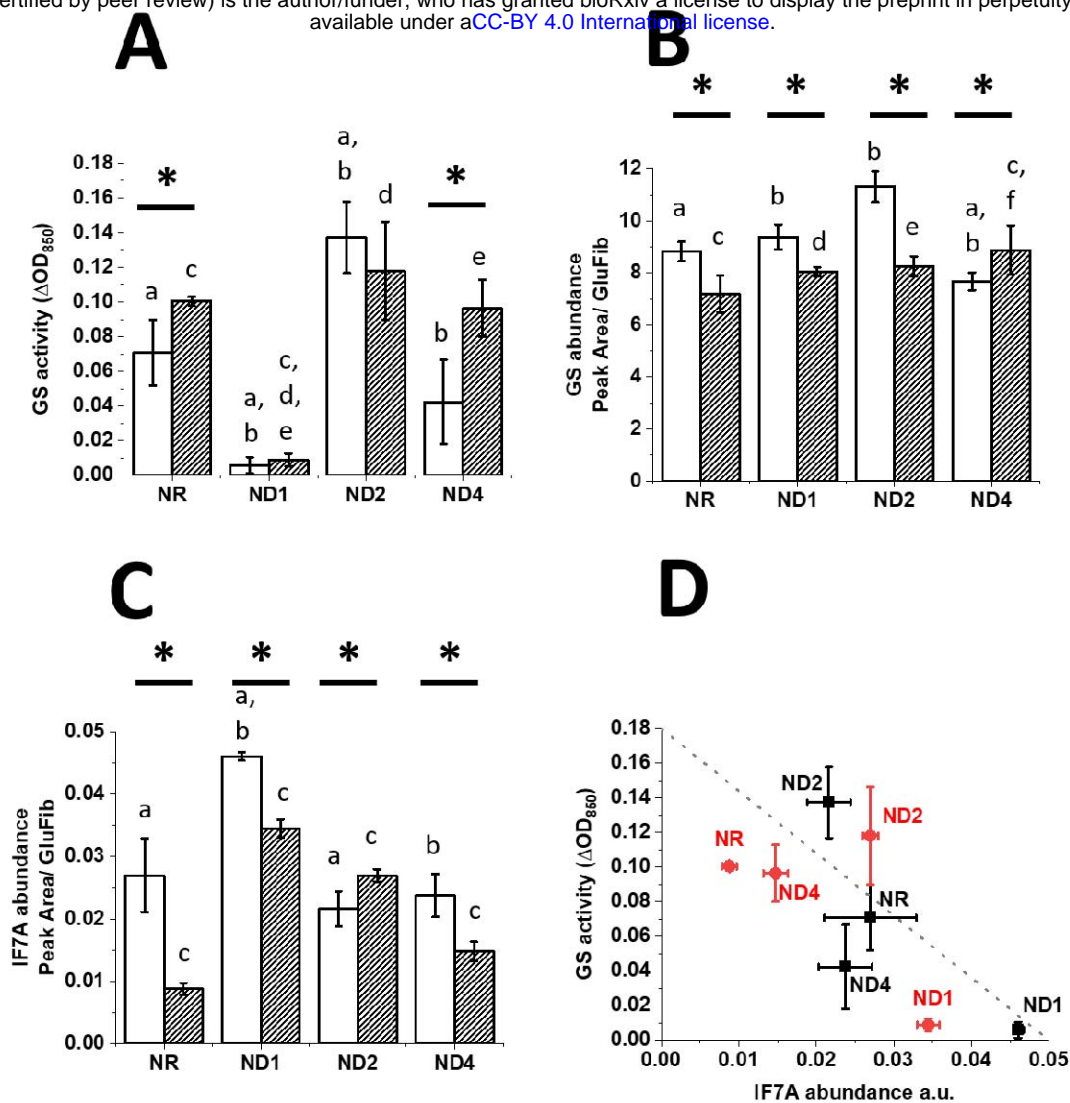

294

295 **Figure 6. Regulation of N assimilation during the switch towards N deprivation in both 7120 WT and  $\Delta amt$**   
 296 **strains.** A. GS activity; B. GS abundance; C. IF7A abundance; D. Correlation between GS activity and IF7A  
 297 abundance. Time points are those indicated in Fig. 4A and correspond to NR (Nitrogen Replete), ND1, ND2 and  
 298 ND4, respectively 1, 2 and 4 days after Nitrogen Deprivation. Data are indicated as average  $\pm$  SD of 6 biological  
 299 replicates. Statistically significant differences between WT (white bars and black squares) and  $\Delta amt$  (striped  
 300 bars and red circles) are indicated with an asterisk, whilst the same alphabet letter indicates statistically  
 301 significant differences for the same strain in different growth conditions (one-way ANOVA,  $p$ -value < 0.05).

302

303

304 GS is the major entry point of fixed N in the central metabolism of 7120 (Bolay *et al*, 2018).  
 305 Nevertheless, other enzymes control the availability of GS substrates, thus indirectly contributing to  
 306 the regulation of N assimilation. These include GOGAT (responsible for the regeneration of Glu in the  
 307 GS-GOGAT cycle), IDH (responsible for the synthesis of 2-OG, a substrate of GOGAT) and GDH  
 308 (involved in the reversible conversion between Glu and 2-OG) (Martín-Figueroa *et al*, 2000; Bolay *et al*  
 309 *et al*, 2018; Forchhammer & Selim, 2019). Under the tested experimental conditions, the deletion of  
 310 the whole *amt* cluster had major consequences also on the abundance of such enzymes  
 311 (Supplementary fig. S5). GOGAT accumulation followed the same trend in both strains over the  
 312 course of the experiment (i.e. strong downregulation as a consequence of N deprivation,  
 313 supplementary fig. S5A), while IDH and GDH displayed different trends in the two genetic

314 backgrounds (Supplementary fig. S5B and S5C, respectively). These observations support the notion  
 315 that the absence of AMT transporters triggers both direct and indirect effects on N metabolism in  
 316 7120.

317

318 *The absence of AMT transporters affects the master regulatory network of N metabolism*

319 Given the impact of  $\Delta amt$  on both GS and nitrogenase, the question is how widespread the  
 320 adjustments had rippled further into the cellular system? In order to address this question, we  
 321 investigated the N metabolism more deeply, with an expanded number of protein quantification  
 322 targets. The C/N balance of the cell is in fact also known to regulate the interaction between NctA,  
 323 PipX and PII in 7120 (Forchhammer & Selim, 2019), which are expected to be the major molecular  
 324 players controlling the metabolic remodelling in response to both the nature and availability of N  
 325 source in the external environment, in 7120 (Fig. 1). The transcription factor NctA, active only once  
 326 bound to PipX, regulates the abundance of nitrogenase, GS and IF7A (Flores & Herrero, 2005). As  
 327  $\Delta amt$  both responds to N deprivation more quickly than the parental strain, by activating faster N  
 328 fixation (Fig. 5), and also shows major alterations in the regulation of N assimilation (greater GS  
 329 activity), we wondered whether the mutation might have an effect on such master molecular  
 330 regulators, which control both enzymatic steps in this species (i.e. NctA, PII and PipX, Fig. 1) and we  
 331 thus quantified their abundance (Fig. 7).

332

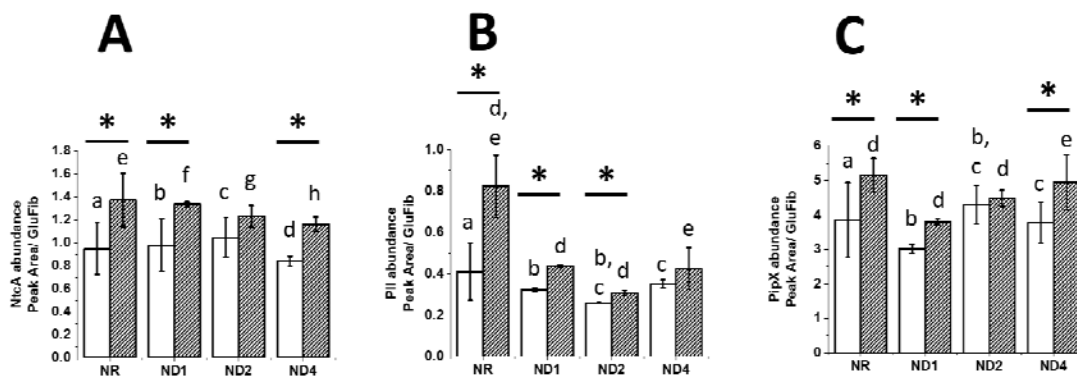

333 **Figure 7. Abundance of the three major molecular players regulating N metabolism in 7120.** A. NctA; B. PII; C.  
 334 PipX. Time points are those indicated in Fig. 4A and correspond to NR (Nitrogen Replete), ND1, ND2 and ND4,  
 335 respectively 1, 2 and 4 days after Nitrogen Deprivation. Data are indicated as average  $\pm$  SD of 6 biological  
 336 replicates. Statistically significant differences between WT (white bars) and  $\Delta amt$  (striped bars) are indicated  
 337 with an asterisk, whilst the same alphabet letter indicates statistically significant differences for the same  
 338 strain in different growth conditions (one-way ANOVA,  $p$ -value  $< 0.05$ ).

339

340

341 Overall,  $\Delta amt$  accumulated more of the three proteins over the course of the experiment relative to  
 342 the parental strain, suggesting the absence of AMT transporters has an extensive impact on the  
 343 cellular system, involving the master regulatory network of N metabolism. This might explain the  
 344 more rapid activation of N -fixation in response to N deprivation and also the effect on N  
 345 assimilation, discussed above (Fig. 5 and Fig. 6). Moreover, while the abundance of the three  
 346 proteins does not vary much over the course of the experiment in WT, PII does respond to N  
 347 deprivation and is more abundant under NR conditions in  $\Delta amt$  (Fig. 7B). This suggests PII might be

348 degraded after induction of N deprivation, possibly as a consequence of a greater phosphorylation  
349 rate (see Fig. 1 for the molecular mechanisms controlling PII/PipX interaction). These results  
350 strengthen the notion that AMT transporters play a central role in the regulation of N metabolism in  
351 7120.

352

### 353 *Metabolic remodelling as a consequence of amt deletion*

354 Under diazotrophic conditions, coordinated metabolic interaction between vegetative cells and  
355 heterocysts is seminal for optimal growth. The absence of AMT transporters triggered an extensive  
356 remodelling at the protein level in 7120, spanning both cell types, given some of the proteins  
357 investigated in this work are known to be exclusively expressed in one of the two cell types [e.g.  
358 GOGAT in vegetative cells, (Martín-Figueroa *et al*, 2000)]. We therefore wondered whether the same  
359 also happens at the metabolite pool level. Cyanobacteria evolved the ability to store assimilated N in  
360 the form of cyanophycin granule polypeptide (CPG), possibly acting as a buffer to naturally varying N  
361 -fixation due to fluctuations in N supply and day/night cycles (Watzer & Forchhammer, 2018). In  
362 heterocystous filamentous cyanobacteria, CPG accumulates at the contact sites between heterocysts  
363 and adjacent vegetative cells and is expected to regulate the transfer of fixed N from the former to  
364 the latter (Burnat *et al*, 2014), thus influencing metabolite exchange between the two cell types (see  
365 supplementary Fig. S6A for a schematic overview of CPG metabolism in 7120). In order to investigate  
366 whether the metabolites exchange between the two cell types was also affected by the mutation,  
367 we studied potential alterations in the CPG metabolism (Fig. 8).

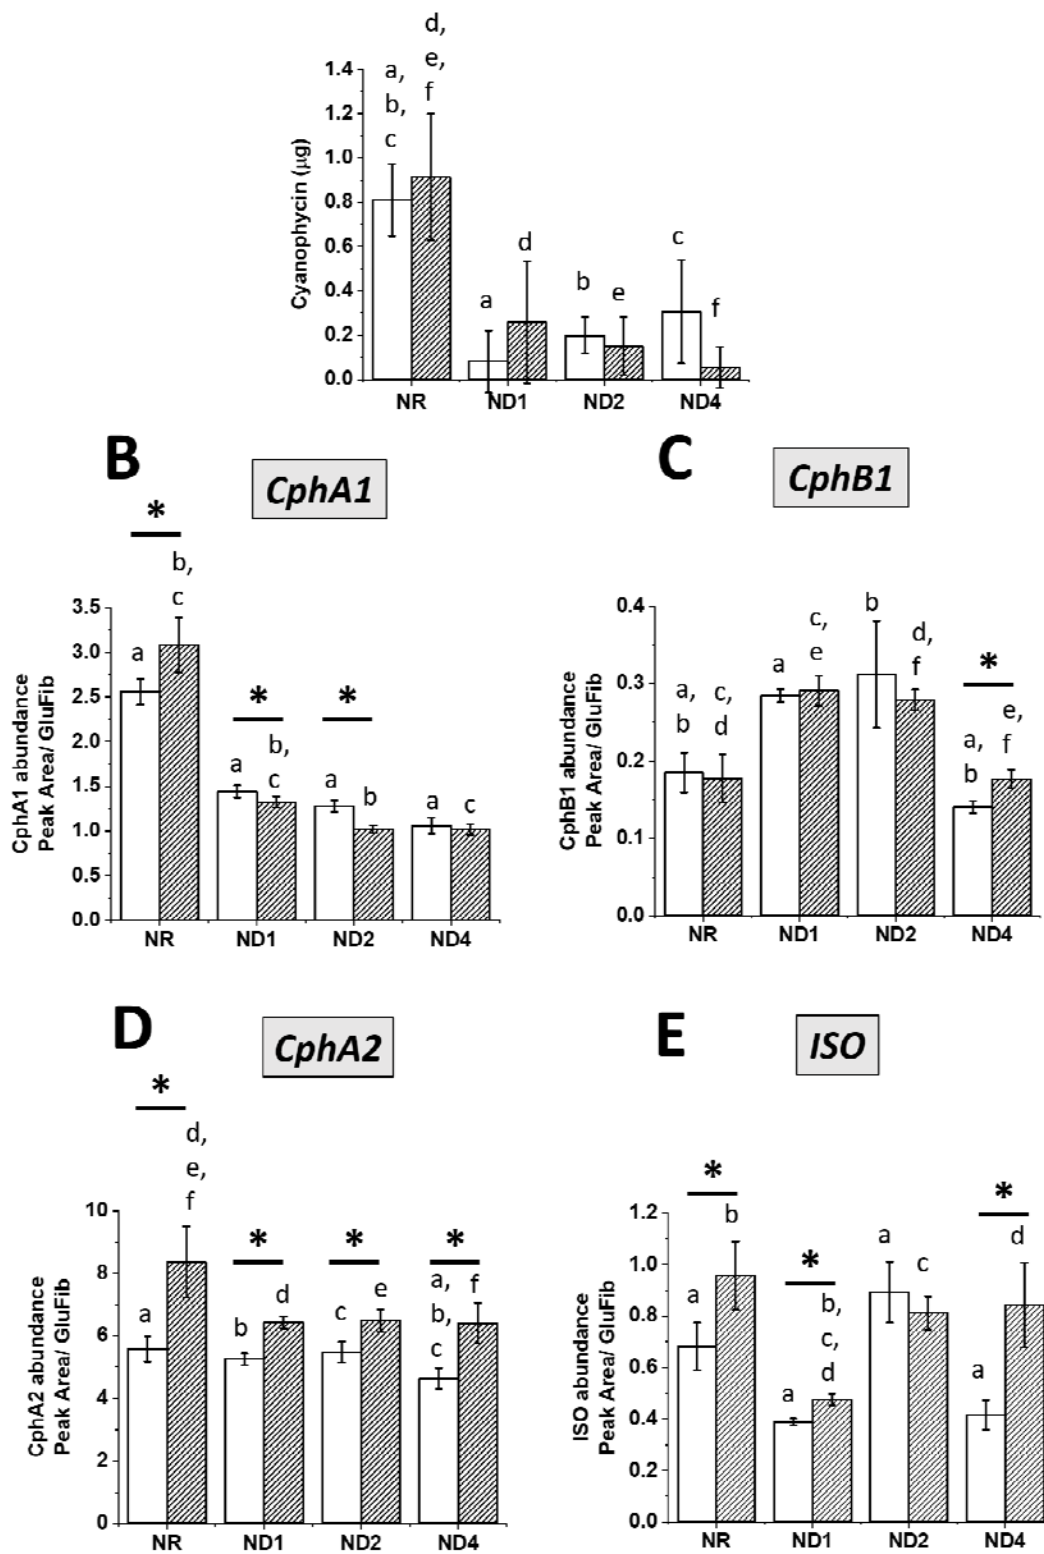

368

369 **Figure 8. Cyanophycin (CPG) content and abundance of the four major enzymes regulating its metabolism in**

370 **both WT and Δamt strain. A. Cyanophycin content in both WT and Δamt strains in the four time points chosen**

371 **in this experiment, according to Fig. 4A. The same amount of biomass was processed in all conditions for both**

372 **strains (see materials and methods). B, C, D and E. Abundance of the four major proteins [i.e. Cyanophycin**

373 *synthetase (CphA1), Cynaophycinase (CphB1), Cyanophycin synthetase 2 (CphA2) and Isoaspartyl dipeptidase*  
374 *(ISO), respectively for B, C, D and E] regulating cyanophycin metabolism in 7120, in the four time points chosen*  
375 *in this experiment (Fig. 4A). Data are indicated as average  $\pm$  SD of 6 biological replicates. Statistically significant*  
376 *differences between WT (white bars) and  $\Delta$ amt (striped bars) are indicated with an asterisk, whilst the same*  
377 *alphabet letter indicates statistically significant differences for the same strain in different growth conditions*  
378 *(one-way ANOVA,  $p$ -value  $< 0.05$ ). See supplementary fig. S6 for an overview of CPG metabolism.*

379

380

381 Under the tested experimental conditions, both strains accumulated CPG in NR conditions as  
382 expected (Forchhammer & Watzer, 2016), suggesting the deletion of AMT transporters did not  
383 perturb N storage to the point of affecting CPG accumulation. In fact, both strains show the same  
384 CPG content in NR (Fig. 8A), indicating the pool of available CPG to support the metabolic needs of  
385 the cell is not affected by the mutation at this time point. Nevertheless, the abundance of three out  
386 of four major enzymes controlling CPG metabolism (Supplementary Fig. S6) is significantly different  
387 between the two strains, with CphA1, CphA2 and ISO showing increased accumulation in the mutant  
388 with respect to the parental strain in NR (Fig. 8B, D and E). We therefore hypothesised that the  
389 overall CGP metabolic flux is accelerated in the mutant under NR conditions, possibly enabling a  
390 faster response to environmental changes. When cells experience N deprivation, the cyanophycin  
391 content decreases, presumably as it is rapidly used as N source (Forchhammer & Watzer, 2016) (i.e.  
392 after one day of N deprivation CPG is fully consumed, Fig. 8A). Nevertheless, whilst CPG starts  
393 building up again in the parental strain after two days of N deprivation, a constant consumption  
394 trend is observed over the course of the experiment in the mutant (Fig. 8A). This suggests that N  
395 fixation in the WT exceeds metabolic needs and a fraction of the assimilated N is thus stored as CPG,  
396 while in the mutant this trend is disrupted. Out of the four major enzymatic steps controlling CPG  
397 metabolism in 7120, cyanophycin synthetase (CphA1), the major enzyme controlling CPG  
398 biosynthesis (Forchhammer & Watzer, 2016), is most affected by N deprivation (Fig. 8 B, C, D and E),  
399 with the mutant showing a faster reduction in its abundance than the parental strain (Fig. 8B). It is  
400 also worth noting that cyanophycin synthetase 2 (CphA2), a truncated version of CphA1 catalysing  
401 the direct recycling of the  $\beta$ -aspartyl-arginine dipeptide into CPG (Supplementary Fig. S6,  
402 (Forchhammer & Watzer, 2016)), is more abundant in the mutant strain in all time points (Fig. 8D),  
403 strengthening the notion that CPG metabolism is accelerated in  $\Delta$ amt.

404 CPG accumulation in N fixing cyanobacteria is mediated by PII which in turn regulates N-  
405 acetyl-N-glutamate kinase (NAGK) activity (Forchhammer & Selim, 2019). NAGK catalyses the  
406 conversion of N-acetyl-L-glutamate to N-acetyl-L-glutamyl-phosphate, which is further converted to  
407 ornithine, from where Arg, the end -product of the pathway, is derived. Therefore, CPG biosynthesis  
408 directly follows the concentration of free Arg in the cell, as a consequence of feedback inhibition of  
409 NAGK (Watzer *et al*, 2015). In our experimental conditions, the free Arg concentration indeed  
410 strongly decreased upon N deprivation in both strains (Fig. 9A and B), confirming the strong  
411 reduction in CPG content upon N deprivation, observed before (Fig. 8A).

412



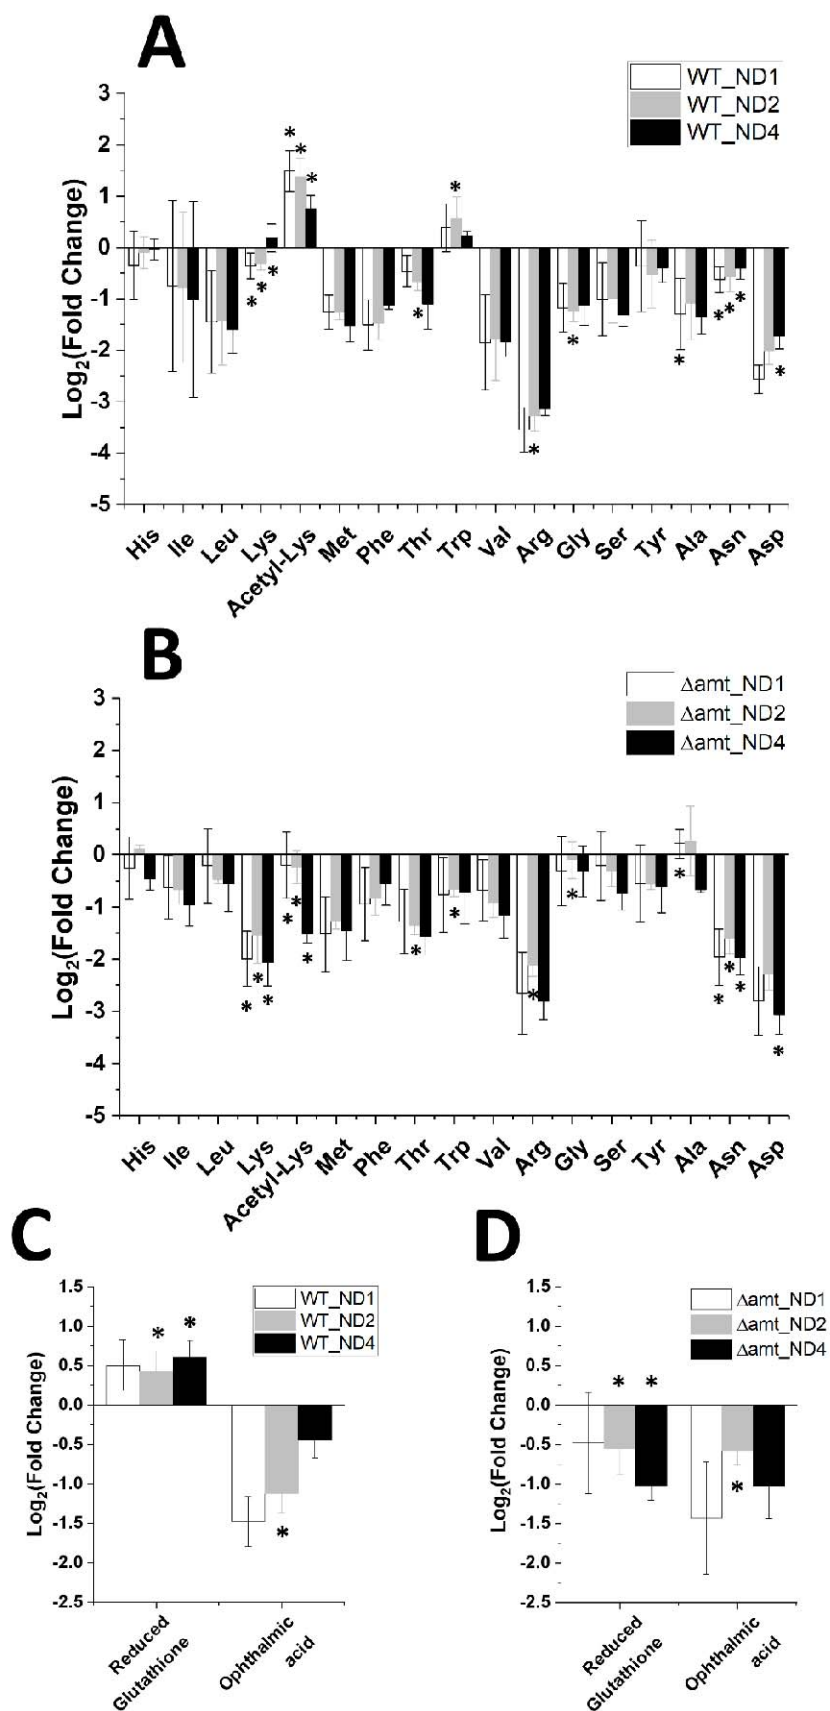

414 **Figure 9. Pool of free amino acids and oxidative stress markers in both WT and  $\Delta amt$  strain, upon**  
415 **N deprivation.** Free amino acid pool (A and B) and oxidative markers (C and D) in the WT strain (A  
416 and C) and in the  $\Delta amt$  mutant (B and D) in the four time points chosen in this experiment, according  
417 to Fig 4A. Data are expressed as base two logarithm of the fold change (FC) of the abundance of each  
418 metabolite between each of the three time points after N deprivation (i.e. ND1, 2 and 4) and N  
419 replete conditions (NR). Data are indicated as average  $\pm$  SD of 6 biological replicates. Statistically  
420 significant differences between WT and  $\Delta amt$  for each metabolite at a specific time point are  
421 indicated with an asterisk (one-way ANOVA,  $p$ -value < 0.05).

422

423

424 Overall, both strains display a reduction in the whole pool of free amino acids as a consequence of N  
425 deprivation (Fig. 9A and B), likely suggesting a faster turnover upon N-fixing conditions.  
426 Nevertheless, upon N deprivation, the  $\Delta amt$  strain also shows substantial remodelling of the free  
427 amino acid pools (Fig. 9B), relative to the parental strain (Fig. 9A). Major amino acids affected by the  
428 mutation are Lys and Asn, which display a stronger reduction in the mutant upon N deprivation,  
429 followed by Thr, Trp, Arg, Gly, Ala and Asp (Fig. 9B), which instead show minor but still relevant  
430 alterations. These results indicate a comprehensive impact on the amino acid metabolism in 7120 as  
431 a consequence of the mutation. It is also worth noting the pool of acetyl-lysine is differentially  
432 regulated in the two strains upon N deprivation (Fig. 9A and B), suggesting a comprehensively  
433 different regulation of the whole central metabolism.

434 Amino acids are substrates for the synthesis of several molecular players, important for the  
435 homeostatic control of the cell. Among them, glutathione (Cameron & Pakrasi, 2010) and  
436 ophthalmic acid (Ito *et al*, 2018) belong to a robust antioxidant buffering system which plays an  
437 important role in protecting against reactive oxygen species (ROS) generated as by-product of  
438 photosynthetic metabolism (Narainsamy *et al*, 2016).

439 Interestingly, while no major differences between the two strains were observed for  
440 ophthalmic acid upon N deprivation, the content of reduced glutathione (GSH) increased in WT (Fig.  
441 9C) and it decreased in  $\Delta amt$  (Fig. 9D), suggesting the mutant suffers from redox stress upon N  
442 deprivation.

443

#### 444 *Gln, Glu and 2-OG pools*

445 The metabolic pool concentration of several key metabolites in N metabolism, Gln, Glu and 2-OG  
446 [Fig. 1, (Martín-Figueroa *et al*, 2000; Böhme, 1998; Picossi *et al*, 2005)], was also affected by the *amt*  
447 mutation. The pool of free Glu increased in both strains over the course of the experiment (Fig. 10A  
448 and B), whilst the concentration of Gln dropped substantially in the wild-type upon N deprivation  
449 (Fig. 10A). Interestingly, the concentration of Gln is several-fold lower in  $\Delta amt$  under N replete  
450 conditions and also drops upon elimination of assimilable N (Fig. 10B). Hence, the Gln/Glu ratio in  
451 the mutant is indicative of a partially deprived N metabolic state even in the presence of assimilable  
452 N (Supplementary Fig. S7), potentially affecting also the metabolic exchange between the two cell  
453 types (no difference in the number of heterocysts was observed between the two strains over the  
454 course of the experiment, see Supplementary Fig. S4). Similarly, the mutant also has a slightly lower  
455 2-OG content than the parental strain under NR conditions (Fig. 10C), and consequently a higher 2-  
456 OG/Gln ratio (Supplementary Fig. S8), in line with the hypothesis that 2-OG is indicative of metabolic  
457 N availability (Muro-Pastor *et al*, 2001). The difference between the two strains is admittedly small,  
458 at only around 18% – but then, the decrease in 2OG following N deprivation is only about 40%, so  
459 even this small decrease could represent a change in N status.

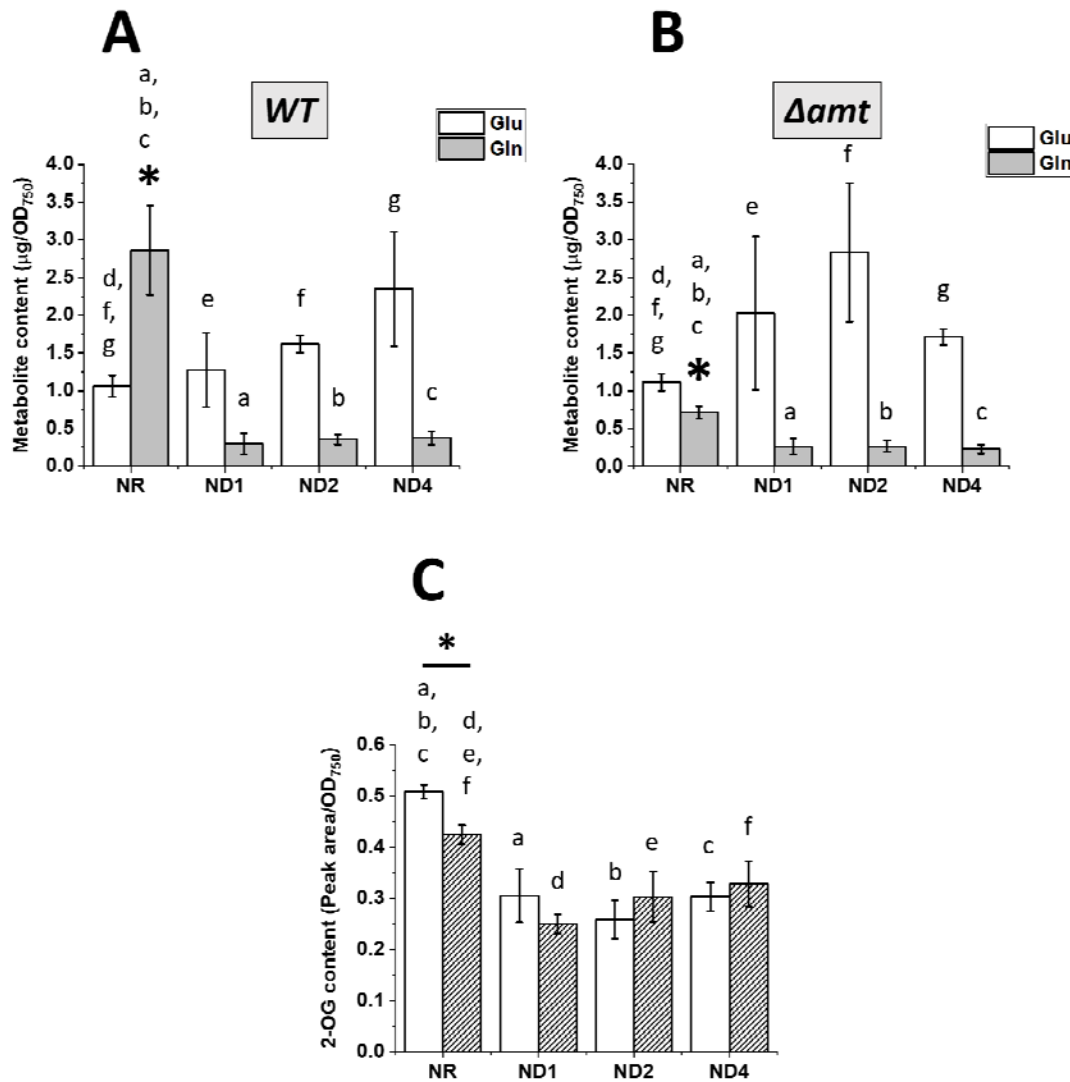

460 **Figure 10. Metabolic pool concentration of key metabolites in *N* metabolism.** *Glu*, *Gln* (A, B) and 2-  
 461 *OG* (C) content in 7120 WT and  $\Delta amt$  strains, in the experimental conditions of Fig. 4A. *Glu* (white  
 462 bars) and *Gln* (grey bars) content is split in two distinct panels for WT (A) and  $\Delta amt$  (B). C. 2-*OG*  
 463 content in WT (white bars) and  $\Delta amt$  (striped bars). Results come from the same amount of biomass  
 464 for both strains and for different growth conditions. Data are indicated as average  $\pm$  SD of 6  
 465 biological replicates. Statistically significant differences between WT and  $\Delta amt$  for each metabolite  
 466 at a specific time point are indicated with an asterisk, whilst the same alphabet letter indicates  
 467 statistically significant differences for the same strain and metabolite, in different growth conditions  
 468 (one-way ANOVA,  $p$ -value < 0.05).

469  
 470

471 **Discussion**

472 Biological systems can be fuelled by multiple N sources, but they are all converted to  
473 ammonium/ammonia before assimilation, as the latter is the most reduced and energetically  
474 favourable bioavailable form of N. The translocation of ammonium/ammonia across biological  
475 membranes is therefore expected to play a potential key role in the regulation of N metabolism.  
476 Active ammonium/ammonia translocation [whether it involves the charged or uncharged form is still  
477 debated and it is likely to depend on the species in question (Ludewig, 2006; Ludewig *et al*, 2007;  
478 Boogerd *et al*, 2011; Wang *et al*, 2012; Javelle *et al*, 2007)] across biological membranes is catalysed  
479 by AMT transporters, a protein family widely distributed across multiple domains of life (Andrade &  
480 Einsle, 2007).

481 In this work we exploited a KO mutant of the whole *amt* cluster (i.e.  $\Delta amt$ ) in *Anabaena sp. PCC*  
482 *7120* (Paz-Yepes *et al*, 2008) to perturb both sensing and uptake of  $\text{NH}_4^+$ , with the aim to investigate  
483 how a  $\text{N}_2$ -fixing cyanobacterium responds to perturbation of N -metabolism at a whole cell level.

484 We cultivated both 7120 WT and  $\Delta amt$  strains in different N regimes (i.e. different N sources  
485 and N replete/deplete conditions). The underlying idea was to trigger different inner N states and  
486 investigate them through physiological, proteomic and metabolomic analyses. Upon N deprivation,  
487 *Anabaena sp. PCC 7120* differentiates a fraction of its cells into heterocysts to enable efficient N  
488 fixation (Golden & Yoon, 1998; Kumar *et al*, 2010), posing several limitations to integrated studies  
489 such as this one. One of them is the need to process the samples as a mixture of the two cell types,  
490 in order to avoid metabolic changes that are inevitable consequence of physical separation  
491 (Ermakova *et al*, 2014). This necessary choice forgoes discrimination of the metabolic status of the  
492 two cell types. Nevertheless, some proteins and metabolites are unique to one of the two cell types  
493 (Martín-Figueroa *et al*, 2000), enabling to partially overcome such limitations. Moreover, we did not  
494 observe any difference in the ratio of heterocysts to vegetative cells in response to any of the  
495 genetic or environmental treatments investigated in this work (Supplementary Fig. S4).

496

497 *Lack of AMT transporters triggers a substantial response at the whole cell level, but doesn't induce*  
498 *any visible phenotype*

499 In the constant laboratory conditions tested in this work, we observed AMT transporters are not  
500 essential to support growth of 7120, regardless of the N source used to sustain the central  
501 metabolism (Fig. 2A and 4A), as previously reported (Paz-Yepes *et al*, 2008). This finding  
502 corroborates what has been observed in other bacteria [e.g. *Rhodobacter capsulatus* (Yakunin &  
503 Hallenbeck, 2002)], suggesting a conserved transporter-independent function for AMT transporters  
504 across unrelated bacteria species.

505 Nevertheless, the mutant surprisingly displays several changes in the abundance of proteins  
506 and metabolite pools with a central role in N metabolism, triggering also a substantial effect on key  
507 enzymatic activities. Among them, we observed: (1) a substantial increase in nitrogenase activity  
508 (Fig. 2B and 5A), likely due to an increased accumulation of the protein complex (Figure 5B and 5C);  
509 (2) an increased GS activity in  $\text{NH}_4^+$ -replete conditions and upon prolonged N deprivation (Fig. 2C  
510 and 6A), as a consequence of changes in the abundance of proteins which play both a direct and/or  
511 indirect role on GS activity such as: (a) changes in the abundance of both the GS protein itself (Fig.  
512 3A and 6B) and the post-translational negative regulator IF7A (Supplementary Fig. S3 and Fig. 6C)  
513 and (b) changes in the abundance of GDH, GOGAT and IDH, which re-generate its substrates  
514 (Supplementary Fig. S5). It is worth noting that some of these observations correlate with what has  
515 already been observed in other organisms, such as the photosynthetic purple bacterium  
516 *Rhodobacter capsulatus*, in which the absence of the AMTB transporter influenced both nitrogenase

517 and GS activity, thus strengthening the hypothesis that such proteins might share the same role in  
518 the regulation of N metabolism, even in distinct bacteria species (Yakunin & Hallenbeck, 2002).  
519 Moreover, we also observed that the pool of free amino acids (Fig. 9A and 9B), redox markers (Fig.  
520 9C and 9D) and metabolites with a key role in N metabolism orchestration (i.e. Gln, Glu and 2-OG,  
521 Fig. 10) is affected by the mutation. The  $\Delta amt$  mutant also displays substantial changes in  
522 photosynthetic performances and pigment content with respect to the parental strain (Fig. 4B and  
523 Table 1).

524 It is worth noting that the biochemical changes observed in the mutant do not translate in  
525 any phenotypic difference with respect to the parental strain (i.e. growth is unaffected, Fig. 2A and  
526 Fig. 4A), highlighting the strong robustness of the biological system under investigation. The latter  
527 most likely depends on its ability to undergo this very substantial homeostatic adjustment at the  
528 whole cell level, as a consequence of both genetic (i.e.  $\Delta amt$ ) and environmental treatments (i.e.  
529 different N regimes).

530

531 *Lack of AMT transporters induces metabolic adaptation spanning both C and N metabolism, with a*  
532 *potential impact on the metabolites exchange between heterocysts and vegetative cells*

533 As in many biological systems, N and C metabolism is expected to be tightly coupled (Zhang *et al*,  
534 2018) also in 7120, thereby maintaining a properly balanced C/N ratio even when exposed to  
535 external perturbations (Forchhammer & Selim, 2019). When the C source (i.e. CO<sub>2</sub> in case of  
536 phototrophic metabolism) is not limiting, external N source(s) are expected to directly influence the  
537 C/N balance of the cell, with both: (1) efficiency in sensing and uptake and (2) abundance and nature  
538 of such N source(s) playing a central role. In our experiments, 7120 was cultivated in a 1% CO<sub>2</sub>-  
539 enriched atmosphere in order to avoid C limitation and both genetic (i.e.  $\Delta amt$  mutation) and  
540 environmental (i.e. different N sources and abundance) treatments were used to perturb both such  
541 parameters and investigate the response of 7120 at a whole cell level.

542 The mutant displayed substantial changes in the abundance of several metabolites (Fig. 9),  
543 including Gln, Glu and 2-OG. Among them, it is worth noting the difference in the free pool of acetyl-  
544 lysine (Fig. 9A and 9B) which suggests the overall central metabolism regulation might be  
545 comprehensively affected as a consequence of the mutation (Nakayasu *et al*, 2017; Christensen *et al*,  
546 2019). The observed differences in the free pool of acetyl-lysine might reflect either changes in total  
547 protein acetylation, or else changes in the turnover rates of acetylated proteins, with a potential  
548 regulatory role in both photosynthesis and carbon metabolism, as suggested in *Synechocystis sp. PCC*  
549 *6803* (Mo *et al*, 2015). Further confirmation in the lab is however needed to clarify the regulatory  
550 role of protein acetylation in 7120.

551 Differences in the accumulation of Gln, Glu and 2-OG are a clear hallmark of a perturbed C/N  
552 balance (Fig. 10). Gln, Glu and 2-OG are in fact key metabolites involved in the GS-GOGAT cycle,  
553 hence they play a critical role in the central crossroad for C and N metabolism. Moreover, Gln and  
554 Glu metabolism is intertwined with that of several other amino acids as they are the most important  
555 amino groups donor for their synthesis (Reitzer, 2003; Huergo & Dixon, 2015), whilst 2-OG is the  
556 major signalling metabolite used to perceived the intracellular N status by cyanobacteria (Muro-  
557 Pastor *et al*, 2001). In our experiments, 2-OG concentration decreased upon N deprivation (Fig. 10C)  
558 and this correlates with the observed increase in the pool of free Glu (Fig. 10A and 10B), as  
559 cyanobacteria lack 2-OG dehydrogenases and therefore 2-OG is mainly used for the biosynthesis of  
560 Glu or other Glu-derived compounds (Herrero *et al*, 2001). It is worth noting that this trend is not  
561 affected by the mutation (Fig. 10C), which instead induces a reduction in the content of 2-OG in  
562 NH<sub>4</sub><sup>+</sup>-replete conditions (Fig. 10C).

563 Taken together, these data suggest the absence of AMT transporters results in a metabolic  
564 adjustment in response to environmental treatments (i.e. different N regimes), and although not  
565 investigated in the present study, this is likely to affect also the traffic of metabolites between  
566 heterocysts and vegetative cells, as also suggested by the observed differences in CPG metabolism  
567 (Fig. 8).

568

569 *Are AMT transporters an integral part of the N metabolism regulatory/signalling network?*

570 In our experiments, we repeatedly observed substantial changes in GS activity as a consequence of  
571 the mutation. The mutant in fact displays an increased GS activity in  $\text{NH}_4^+$  replete and also in  
572 prolonged N deplete conditions (Fig. 6A and Fig. 2C), likely in response to changes in the abundance  
573 of both the GS protein itself and its post-translational regulator IF7A (Fig. 3 and 6). Moreover, we  
574 observed that GS activity is often retained even if IF7A abundance varies, potentially suggesting an  
575 additional molecular player(s) might also be involved in its regulation. Taken together, our results  
576 suggest AMT transporters might play a direct or indirect IF7A-independent role on GS activity in  
577 7120, thus calling for further scientific efforts in order to fill potential gaps in the  
578 regulatory/signalling network of N metabolism.

579 The changes observed in this work are widespread at a whole cell level, also affecting the master  
580 molecular players which orchestrate N metabolism (i.e. NtcA, PII and PipX, Fig. 7). In particular, the  
581 mutant displays an increased PII abundance in NR conditions, with respect to the parental strain (Fig.  
582 7B). PII belongs to one of the most widely distributed families of signal transduction proteins in  
583 nature, involved in various aspects of N metabolism and regulation of C/N homeostasis  
584 (Forchhammer, 2004, 2008; Arcondeguy *et al*, 2001; Forcada-Nadal *et al*, 2018). Among them, in  
585 heterotrophic bacteria and in archaea, PII proteins of the subfamily GlnK directly interact with AMT  
586 transporters to regulate their activity, typically reducing their uptake rate in N excess conditions to  
587 prevent intracellular over-accumulation of ammonium (Arcondeguy *et al*, 2001). Recent studies  
588 suggest PII protein binds AMT transporters also in cyanobacteria [i.e. *Synechococcus sp. PCC 7942*  
589 (Forchhammer & De Marsac, 1995) and *Synechocystis sp. PCC 6803* (Watzer *et al*, 2019)]. Our  
590 observation of a greater PII abundance, as a consequence of a deletion in AMT transporters,  
591 supports the hypothesis that PII might retain this function also in 7120. If true, this suggests one  
592 potential mechanism for how AMT transporters might influence the regulatory/signalling network of  
593 N metabolism in 7120.

594 It is worth noting that the molecular fingerprint of  $\Delta amt$  cells display symptoms of N -  
595 deficiency relative to the parental strain, also in  $\text{NH}_4^+$  replete conditions, and that observations at  
596 both protein and metabolite level support this hypothesis. Among them: (1) the faster activation of  
597 nitrogenase upon N deprivation (Fig. 5A), (2) the increased GS activity (Fig. 6A), (3) the strong  
598 reduction in the Gln/Glu ratio (Supplementary Fig S7), (4) the slightly reduced 2-OG content (Fig.  
599 10C) and (5) the increased 2-OG/Gln ratio (Supplementary Fig. S8). In contrast, the greater  
600 photosynthetic activity (Fig. 4B) and Chl/Car ratio (Table 1) suggest the mutant does not suffer from  
601 N limitation in NR conditions. This raises the interesting question: what is cause and what is effect?  
602 The observed changes at the protein level are coupled to a widespread metabolic adaptation as a  
603 consequence of the mutation, involving substrates and products of most of the enzymatic reactions  
604 investigated at the protein level. In fact, it is reasonable to expect that some of the changes in the  
605 accumulation of specific proteins might simply result from an adaptation to perturbations of the  
606 metabolite pool or *vice versa*. At this point, we thus cannot conclude whether the  $\Delta amt$  mutant  
607 either is directly suffering from an imbalanced regulatory/signalling network or if it suffers from  
608 perturbations at the metabolite level, which are sensed by such regulatory/signalling network.

609     However, AMT transporters play a direct or indirect role in the regulatory/signalling network which  
610     still warrant further investigations.  
611

612 **Conclusions**

613 We investigated how a mutant of *Anabaena sp. PCC 7120*, impaired in both sensing and low-affinity  
614 up-take of  $\text{NH}_4^+$ , responds to environmental treatments affecting the inner N status of the cells. The  
615 whole cell system responds with substantial internal perturbations embracing both N and C  
616 metabolism. Moreover, the absence of AMT transporters leaves a molecular fingerprint suggesting  
617 N-deficiency, which surprisingly does not lead to any externally measurable phenotypic effects. We  
618 thus hypothesise that 7120 evolved a robust regulatory/signalling molecular network to maintain N  
619 metabolism homeostasis. The observed changes involve both proteins and metabolites, highlighting  
620 a pleiotropic effect of the mutation. We also provided evidence of perturbations to nitrogenase and  
621 GS activity, as well as to master regulators orchestrating N metabolism, thus leading to the  
622 hypothesis that a possible direct or indirect IF7A-independent role of AMT transporters on GS  
623 activity exists in 7120, possibly transduced via the PII protein. Taken together, these evidences  
624 suggest AMT transporters might play an active role in the regulatory/signalling network, calling for  
625 further scientific efforts in order to fill current gaps in N metabolism homeostasis. The work  
626 highlights the dynamic and complex nature of internal mechanisms involved in maintaining  
627 homeostasis and the success in so doing, achieving a near-complete lack of any measurable external  
628 impact.  
629  
630



631 **Material and Methods**

632 **Cyanobacteria strains and growth conditions**

633 Strains of *Anabaena sp. PCC 7120* used in this work are summarised in table 2 and were kindly  
634 provided by Prof. Enrique Flores [institute of Plant Biochemistry and Photosynthesis, University of  
635 Sevilla (Sevilla, Spain)].

636

637 **Table 2. Strains of *Anabaena sp. PCC 7120* used in this work.**

| Strain                            | Genotype                                                                                   | Source                          |
|-----------------------------------|--------------------------------------------------------------------------------------------|---------------------------------|
| <i>Anabaena sp. PCC 7120</i> WT   | Wild-type (WT)                                                                             | Prof. Enrique Flores            |
| <i>Anabaena sp. PCC 7120 Δamt</i> | Δamt::C.K3;<br>Amt4 <sup>-</sup> , Amt1 <sup>-</sup> , AmtB <sup>-</sup> , Nm <sup>R</sup> | (Paz-Yepes <i>et al</i> , 2008) |

638

639 Both strains were maintained in solid BG11 medium (pH 8.0 with the addition of 10 mM final  
640 concentration of TES-NaOH buffer) (Rippka *et al*, 1979) (1.5% Difco Bacto agar, BD) in an Algaetron  
641 230 (PSI, Photon Systems Instruments, Czech Republic), with an atmosphere enriched in CO<sub>2</sub> (1%),  
642 under cool white light at 60 μmoles of photons\*m<sup>-2</sup>\*s<sup>-1</sup>, 30 °C. Illumination rate was determined  
643 using a LI-250A photometer (Heinz-Walz, Effeltrich, Germany). Before starting an experiment, both  
644 strains were switched to liquid medium and pre-cultivated axenically in 100-ml Erlenmeyer flasks in  
645 20 ml BG11<sub>0</sub> (BG11 medium, without NaNO<sub>3</sub>) supplemented with 5 mM NH<sub>4</sub>Cl in the same growth  
646 conditions, under orbital shaking at 160 rpm. Cells were kept in exponential growth conditions,  
647 refreshing the cultures every other day (i.e. replacing half of the volume of the culture with fresh  
648 BG11<sub>0</sub> + 5 mM NH<sub>4</sub>Cl). *Anabaena sp. PCC 7120* Δamt strain was cultivated in presence of 10 μg/ml  
649 neomycin (Nm).

650 For all experiments carried out in this work, strains were cultivated in 6-well polystyrene plates in  
651 the same growth conditions indicated above. Cells pre-cultivated in Erlenmeyer flasks were washed  
652 twice in the final growth medium, through centrifugation for 10 min, 3500 g, RT. Starting OD<sub>750</sub> for  
653 all growth curves = 0.1. Media at different pH values were obtained using 10 mM final concentration  
654 of phosphate, TES-NaOH and CAPS buffers, respectively for pH 6.0, 8.0 and 10.0.

655 Growth was monitored through OD<sub>750</sub> in 96-wells polystyrene plates with a multimode  
656 spectrophotometer (Tecan Infinite M200 Pro). Linear correlation between OD<sub>750</sub> and biomass dry  
657 weight was confirmed for both strains and the growth ranges measured in this work. Biomass dry  
658 weight was measured gravimetrically as previously reported in (Perin *et al*, 2015). Specific growth  
659 rate was calculated by the slope of different growth phases for growth curves plotted in logarithmic  
660 scale.

661

662 **Pigments content and photosynthetic efficiency**

663 Pigments from intact cells grown in 6-wells plates were extracted using a 1:1 biomass to solvent  
664 ratio of 100% methanol, at 4 °C in the dark for at least 20 min (Sinetova *et al*, 2012). Absorbance at  
665 470, 665 and 730 nm was monitored using a multimode spectrophotometer (Tecan Infinite M200  
666 Pro) to determine pigment concentrations, using specific extinction coefficients (Ritchie, 2006;  
667 Wellburn, 1994).

668 Photosynthetic efficiency was assessed measuring *in vivo* chlorophyll fluorescence of intact cells  
669 using an AquaPen-C AP 110-C (PSI, Photon Systems Instruments, Czech Republic). Photosystem II  
670 (PSII) functionality was assessed as PSII maximum quantum yield (Φ<sub>PSII</sub>), according to (Maxwell &  
671 Johnson, 2000).

672

673 **Ammonium/ammonia quantification**

674 Ammonium/ammonia quantification was performed using an adaptation of the method described  
675 by Willis et al. (Willis *et al*, 1996) in order to enable the use of 96-well microtiter plates. Briefly,  
676 *Anabaena sp. PCC 7120* strains grown in 6-well plates were harvested by centrifugation and 10 µl of  
677 the cell-free supernatant were loaded in a flat-bottom 96-well plate. 200 µl of reactive solution (32  
678 g/L sodium salicylate, 40 g/L Na<sub>3</sub>PO<sub>4</sub>·12H<sub>2</sub>O and 0.5 g/L sodium nitroprusside) and 50 µl of  
679 hypochlorite solution (0.25-0.37% active chlorine) were added in this order to the cell-free sample  
680 and the solution made homogenous, before measuring the absorbance at 685 nm in a multimode  
681 spectrophotometer (Tecan Infinite M200 Pro), after incubation for 15 min, 900 rpm, RT in a shaker  
682 (PHMP, Grant Instruments). Ammonium/ammonia concentration in the cell-free samples was  
683 calculated using the linear range of a standard curve prepared with serial dilutions of a NH<sub>4</sub>Cl  
684 solution.

685

686 **Enzymatic activities**

687 **Glutamine synthetase.** Glutamine synthetase (GS) activity was assessed through the method  
688 detailed below, which comes from the combination of different protocols from (Bressler & Ahmed,  
689 1984; Orrs *et al*, 1981; Merida *et al*, 1991).

690 *Preparation of cell-free total proteins extracts.* Strains of *Anabaena sp. PCC 7120* grown in 6-wells  
691 plates were harvested by centrifugation and the supernatant discarded. Cell pellets were transferred  
692 to 2 ml polypropylene tubes and disrupted twice using a TissueLyser II (Qiagen), adding the same  
693 volume of acid-washed glass beads (Sigma-Aldrich) and solubilisation buffer (50 mM Hepes, 0.2 mM  
694 EDTA, pH 7.3), for 5 min at 30 Hz. Tube holders were pre-cooled at -20 °C. Cell extracts were  
695 collected through centrifugation for 10 s, 9000 g, 4 °C. Cell extracts were centrifuged twice for 10  
696 min, 21000 g, 4 °C to eliminate cell debris and insoluble proteins. Total proteins concentration in the  
697 cell-free lysate was assessed through DC protein assay (BIO RAD), following the manufacturer's  
698 manual, using 96-wells plates against a BSA (bovine serum albumin) standard curve.

699 *GS activity assay.* GS catalyses the condensation of glutamate and ammonia to generate glutamine,  
700 hydrolysing ATP (reaction below).

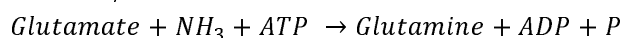

701 GS activity can be measured indirectly, quantifying the amount of phosphate released by the  
702 reaction through colorimetric assay.

703 Enzymatic assay was performed in 550 µl in 24-wells flat bottom polystyrene plates, with 50 µg total  
704 proteins in 364 mM imidazole-HCl, pH 7.0, 1.82 mM NH<sub>4</sub>Cl, 5.45 mM Na-ATP·H<sub>2</sub>O, pH 7.0 (prepared  
705 fresh on ice), 0.52 M MgCl<sub>2</sub>·6H<sub>2</sub>O, 91 mM sodium glutamate, pH 7.0, for 15 min, 400 rpm, 30 °C in a  
706 thermoshaker (PHMP, Grant Instruments). The reaction was then quenched on ice, adding  
707 FeSO<sub>4</sub>·6H<sub>2</sub>O (0.61% w/v in 0.011 N H<sub>2</sub>SO<sub>4</sub> final concentration). In order to develop colour  
708 (proportional to the amount of phosphate released by ATP as a consequence of GS activity),  
709 ammonium heptamolybdate (0.4% w/v in 0.45 M H<sub>2</sub>SO<sub>4</sub> final concentration) was added to the  
710 reaction and solutions were homogenised on ice. Colour intensity of clear samples was measured at  
711 850 nm, using a multimode spectrophotometer (Tecan Infinite M200 Pro). GS activity was calculated  
712 subtracting to each sample the OD<sub>850</sub> of the corresponding blank solution (prepared replacing the  
713 substrate sodium glutamate with water and corresponding to the background signal of phosphate  
714 released by other endogenous ATP-dependent enzymatic reactions).

715 **Nitrogenase.** Nitrogenase activity was determined with an acetylene reduction assay under oxic  
716 culture conditions. Cells grown in 6-well plates were incubated in 2-ml gas chromatography glass  
717 vials under an atmosphere of 10% acetylene in air. Vials were incubated for 3 h in the same original

718 growth conditions (i.e. shaking, light, 30 °C) and the quantity of ethylene in the headspace was  
719 determined by gas chromatography (7820A GC system, Agilent Technologies). The nitrogenase  
720 activity is expressed as % conversion of added acetylene into ethylene, per hour and per µg of Chl.

721

## 722 **Cyanophycin content**

723 **Cyanophycin extraction.** The same amount of biomass ( $OD_{750} = 0.3$ ) of different *Anabaena sp. PCC*  
724 *7120* strains grown in 6-wells plates was harvested by centrifugation and the supernatant discarded.  
725 Cyanophycin was extracted from the cell pellets following the protocol detailed in (Watzer *et al*,  
726 2015), with some modifications as follows. Briefly, cell pellet was resuspended in 1 ml 100% acetone  
727 and incubated in a shaker for 30 min, 1400 rpm, RT. Lysed cells were then centrifuged for 17 min,  
728 21000 g, RT and the supernatant discarded. Pellet was resuspended in 1.5 ml of 0.1 M HCl and  
729 incubated for 1 h, 1400 rpm, 60 °C to solubilise cyanophycin polymers. Solubilised cyanophycin was  
730 centrifuged for 17 min, 21000 g, RT to remove immiscible debris. Tris-HCl, pH 8.0 was added to the  
731 supernatant (0.2 M final concentration) and samples incubated for 40 min, 4 °C. Samples were then  
732 centrifuged for 17 min, 21000 g, 4 °C and pelleted cyanophycin polymers were resuspended in 500 µl  
733 0.01 M HCl for quantification.

734 **Cyanophycin quantification.** Cyanophycin is a polymer of arginine and aspartate (Forchhammer &  
735 Watzer, 2016) and the quantification of arginine released by cyanophycin granules can be used as  
736 proxy for cyanophycin content determination (Burnat *et al*, 2014). Arginine quantification was  
737 performed through a modified colorimetric Sakaguchi method, according to (Messineo, 1966).

738

## 739 **Proteomic analysis**

740 **Sample preparation.** Strains of *Anabaena sp. PCC 7120* grown in 6-wells plates were harvested by  
741 centrifugation and the supernatant discarded. Cell pellets were transferred to 2 ml polypropylene  
742 tubes and disrupted using a TissueLyser II (Qiagen), adding the same volume of acid-washed glass  
743 beads (Sigma-Aldrich) and extraction buffer (20 mM Tris-HCl, pH 8.0, 1 mM EDTA, pH 8.0 and 2 mM  
744 DTT), for 5 min at 30 Hz. Tube holders were pre-cooled at -20 °C. Cells disruption was repeated twice  
745 and cell extracts were collected through centrifugation for 10 s, 9000 g, 4 °C and pulled together  
746 after both cycles. Cell extracts were centrifuged twice for 10 min, 21000 g, 4 °C to eliminate cell  
747 debris and insoluble proteins. Total proteins concentration was assessed through DC protein assay  
748 (BIO RAD), following the manufacturer's manual, using 96-wells plates against a BSA (bovine serum  
749 albumin) standard curve. Cell extracts were diluted by 0.1 M ammonium bicarbonate to have a 0.3  
750 µg/µl total proteins final concentration and the standard peptide [Glu1]-Fibrinopeptide B, human  
751 (GluFib, Sigma Aldrich) was added (0.3 ng/µl, final concentration). Samples were reduced by DTT and  
752 ammonium bicarbonate (final concentration 10 mM and 50 mM, respectively) for 1 h, 56 °C, and  
753 subsequently alkylated adding iodoacetamide prepared fresh in 0.1 M ammonium bicarbonate (50  
754 mM final concentration), for 30 min, 37 °C, 500 rpm in a thermoshaker (PHMT; Grant Instruments).  
755 Alkylated samples were digested by proteomics-grade trypsin (Promega), final concentration 6 ng/µl,  
756 ON, 37 °C. Tryptic digestion was stopped quenching the reaction with formic acid (final  
757 concentration 1%) for 30 min, 37 °C, 500 rpm in a thermoshaker. Acidified samples were centrifuged  
758 at 17000 g, RT, to pellet water immiscible degradation products and the supernatant collected for  
759 mass spectrometry analysis.

760 **Mass spectrometry.** Trypsin digested samples were analysed on an AB-SCIEX 6500QTrap MS coupled  
761 to an Agilent 1100 LC system. Chromatography was performed on a Phenomenex Luna C18(2)  
762 column (100 mm x 2 mm x 3 µm) at 50 °C, using a gradient system of solvents A (94.9% H<sub>2</sub>O, 5%  
763 CH<sub>3</sub>CN and 0.1% formic acid) and B (94.9% CH<sub>3</sub>CN, 5% H<sub>2</sub>O and 0.1% formic acid). A gradient from 0

764 to 35% B over 30 min at a flow rate of 250 ml/min was used. The column was then washed with  
 765 100% B for 3 min and then re-equilibrated with 100% A for 6 min. Typically 40 µl injections were  
 766 used for the analysis. The MS was configured with an Ion Drive Turbo V source; Gas 1 and 2 were set  
 767 to 40 and 60, respectively; the source temperature to 500 °C and the ion spray voltage to 5500 V.  
 768 MS, configured with high mass enabled, was used in “Trap” mode to acquire Enhanced Product Ion  
 769 (EPI) scans for peptide sequencing and in “Triple Quadrupole” mode for Multiple Reaction  
 770 Monitoring (MRM). Data acquisition and analysis was performed with SCIEX software Analyst 1.6.1  
 771 and MultiQuant 3.0. Signature peptides for all the proteins investigated in this work were  
 772 determined through trial MRM runs. Only the peptide GluFib was used as standard for protein  
 773 normalisation. The typical work-flow to select the best signature peptides involved the analysis of  
 774 trial samples in different growth conditions using transitions generated by *in silico* analysis with the  
 775 open-source Skyline Targeted Mass Spec Environment (MacCoss Lab) (MacLean *et al*, 2010;  
 776 Abbatiello *et al*, 2013). The identity of candidate peptides was then confirmed by EPI scans.  
 777 Background proteome of *Anabaena sp. PCC 7120* (<http://genome.kazusa.or.jp/cyanobase>) was used  
 778 to check for uniqueness of target peptides. Typically, 3-5 transitions per peptide were used. The final  
 779 method includes 1-4 peptides per protein for unique identification and quantification. Signature  
 780 peptides for all the proteins investigated in this work are listed in table 3.  
 781 Protein quantification was performed accounting for the intensities of all transitions peaks for all the  
 782 peptides belonging to a specific protein. The resulted peak area was normalized to the peak intensity  
 783 of the GluFib peptide standard.

784

785 **Table 3. Signature peptides for the proteins investigated in this work.** Gene ID, protein ID and  
 786 corresponding biological function are indicated. Peptides sequences show their position within the  
 787 corresponding protein in square brackets.

| Gene ID        | Protein ID | Biological function                     | Peptides sequence               |
|----------------|------------|-----------------------------------------|---------------------------------|
| <b>Alr1827</b> | IDH        | Isocitrate dehydrogenase                | K.GPLTTPVGGGIR.S [100, 111]     |
|                |            |                                         | R.SLNVALR.Q [112, 118]          |
|                |            |                                         | K.LDVIVYR.E [146, 152]          |
| <b>Alr2328</b> | GS         | Glutamine synthetase                    | K.IELIDLK.F [15, 21]            |
|                |            |                                         | K.LGVPIEK.H [205, 211]          |
|                |            |                                         | R.IPLSGTNP.K.A [348, 356]       |
| <b>Alr4344</b> | GOGAT      | Glutamine oxoglutarate aminotransferase | K.NIYELSPEELAK.V [399, 410]     |
|                |            |                                         | R.FAQVTNPAIDPLR.E [548, 560]    |
|                |            |                                         | R.SLSEIIGR.A [1232, 1239]       |
| <b>Alr4255</b> | GDH        | Glutamate dehydrogenase                 | K.TLPIVNTDR.T [1310, 1318]      |
|                |            |                                         | R.LDNGDIR.V [66, 72]            |
| <b>Asl2329</b> | IF7A       | Glutamine synthetase regulator          | R.TLEGVK.V [227, 232]           |
|                |            |                                         | SAQELGLPAEELSHYWNPTQGK [29, 50] |
| <b>Alr4392</b> | NtcA       | Nitrogen-responsive regulatory protein  | K.TIFFPGDPAER.V [32, 42]        |
|                |            |                                         | R.ENSVFGVLSLLTGNK.S [70, 84]    |
|                |            |                                         | R.LLGDLR.E [192, 197]           |
| <b>Ar0485</b>  | PipX       | Pll interacting protein                 | R.LFFLVGNDIK.A [38, 47]         |
|                |            |                                         | K.FQPIGR.T [51, 56]             |
|                |            |                                         | K.IIAAAR.T [76, 81]             |
| <b>All2319</b> | Pll        | Nitrogen regulatory protein Pll         | R.TGEIGDGK.I [82, 89]           |
|                |            |                                         | K.IFISPVEQVIR.I [90, 100]       |
| <b>All1440</b> | NifK       | Nitrogenase molybdenum-iron protein     | R.EALTVNPAK.G [59, 67]          |

|          |        |                                                 |                                                                                                               |
|----------|--------|-------------------------------------------------|---------------------------------------------------------------------------------------------------------------|
|          |        | beta chain                                      | K.AIPEELEIER.G [334, 343]<br>R.IGYPLFDR.H [457, 464]                                                          |
| All1554  | NifD   | Nitrogenase molybdenum-iron protein alpha chain | K.ELIQEVLK.A [14, 21]<br>K.LIEELDVLFLPLNR.G [135, 147]<br>K.IAASLR.E [311, 316]<br>K.AELEQDIQDLK.D [144, 154] |
| All3879  | CphA1  | Cyanophycin synthetase                          | R.GITIDIR.S [269, 275]<br>R.GSASELITK.G [808, 816]<br>R.TPQATK.T [23, 28]                                     |
| All3880  | CphB1  | Cyanophycinase                                  | K.VEILDIR.E [90, 96]<br>R.DGWLQVLGK.G [232, 240]<br>K.GIGVTADVK.D [263, 271]                                  |
| Allr0573 | CphA2  | Cyanophycin synthetase 2                        | R.DAVFVNR.S [521, 527]<br>R.DDYNISNIQSLLR.N [534, 545]<br>R.FSGVINVS.R.V [93, 101]                            |
| All3922  | ISO    | Isoaspartyl dipeptidase                         | R.GTIGVVALDITYGK.L [178, 190]<br>K.LAVGTSTGGK.G [191, 200]                                                    |
| Standard | GluFib | [Glu1]-Fibrinopeptide B, human                  | EGVNDNEEGFFSAR [0, 13]                                                                                        |

788

## 789 Metabolomic analysis

790 **Sample preparation.** Strains of *Anabaena sp. PCC 7120* grown in 6-wells plates were harvested by  
 791 fast filtration, modifying the protocol from (Eisenhut *et al*, 2008). Briefly, cells were fast filtered in  
 792 the light without any subsequent washing step, using a vacuum filtration system (0.45 µm pore size  
 793 nitrocellulose filter, 47 mm diameter (Sigma Aldrich)), using stainless-steel stand and funnel  
 794 (Sartorius). Filters were then transferred to 50 ml tubes and immediately frozen in liquid nitrogen  
 795 and stored at -80 °C until metabolites extraction. Time between harvesting and metabolic  
 796 inactivation by freezing was <10 sec. Deep frozen cells were scraped off the nitrocellulose filters  
 797 using 80% cold methanol (-20 °C). Cells in cold methanol were transferred to 2 ml polypropylene  
 798 tubes and metabolite extraction was carried out with a TissueLyser II (Qiagen), using tube holders  
 799 pre-cooled at -20 °C and adding the same volume of acid-washed glass beads (Sigma-Aldrich), for 5  
 800 min at 30 Hz. Metabolites were collected after centrifugation for 10 min, 21000 g, 4 °C. Metabolite  
 801 extraction was repeated twice, the extracts pooled together and centrifuged again to separate cell  
 802 debris and other immiscible products. Metabolic extracts were then dried by vacuum centrifugation  
 803 overnight and stored at -80 °C until use.

804 **Sample derivatisation and mass spectrometry.** Dried metabolic extracts were reconstituted in 300  
 805 µl of water, using L-phenylalanine-d<sub>5</sub> as internal standard (final concentration 2 µg/ml), then  
 806 vortexed and centrifuged at 16000g for 10 min. Quality control (QC) samples were prepared by  
 807 mixing 10 µl of the supernatant of each sample, with the analytical batch including 10% QC samples.  
 808

809 **Amino acids quantification.** 6-aminoquinolyl-N-hydroxysuccinimidyl carbamate was used for  
 810 derivatization (AccQTag derivatization) according to the manufacturer's manual (AccQTag, Waters  
 811 Corp). Briefly, 70 µl of borate buffer (pH 8.6) was added to 10 µl sample, followed by the addition of  
 812 20 µl AccQTag reagent (in acetonitrile). Samples were then vortexed and heated at 55°C for 10  
 813 minutes. 5 µl of each sample were analysed by HPLC-electrospray ionisation/MS-MS using a  
 814 Shimadzu UFLC XR/AB SCIEX Triple Quad 5500 system, running in multiple reaction monitoring  
 815 (MRM) via positive ionization mode. The LC-MS method here exploited is based on the one  
 816 previously described by (Gray *et al*, 2017), with some modifications, as detailed below.

817 *LC method.* Mobile phase A: LC-MS grade water with 0.5% formic acid; mobile phase B: LC-MS grade  
818 acetonitrile with 0.5% formic acid. Flow rate: 300 µl/min, with the following gradient elution profile:  
819 0.1 min, 4% B; 10 min, 28% B; 10.5 min, 80% B; 11.5 min, 80% B; 12 min, 4% B; 13 min, 4% B. An  
820 Acquity HSS T3 UPLC column [2.1 mm × 100 mm, 1.8 µm particle size (Waters Corporation, Milford,  
821 MA, U.S.A.)] was used to achieve metabolite separation at 45°C.

822 *MS method.* The data were acquired through a Sciex QTRAP 5500 MS/MS system [Applied Biosystem  
823 (Forster City, CA, USA)], using the following settings: curtain gas, 40 psi; collision gas, medium;  
824 ionspray voltage, 5500 V; temperature, 550°C; ion source gas 1 and 2, 40 and 60 psi, respectively.  
825 De-clustering, entrance and collision cell exit potentials were set to 30 V, 10 V and 10 V, respectively.  
826 Multiple reaction monitoring (MRM) transitions, retention time (RT) and individually optimised  
827 collision energy (CE) for each metabolite are listed in supplementary table S1.

828

829 *2-oxoglutarate (2-OG) quantification.* The ion pairing LC method here exploited was adapted from  
830 (Michopoulos, 2018), according to the following settings. Mobile phase A: 10 mM tributylamine  
831 (TBA) and 15 mM acetic acid in LC-MS grade water; mobile phase B: 80% methanol and 20%  
832 isopropanol. Flow rate: 400 µl/min, with the following gradient elution profile: 0 min, 0% B; 0.5 min,  
833 0% B; 4 min, 5% B; 6 min, 5% B; 6.5 min, 20% B; 8.5 min, 20% B; 14 min, 55% B; 15 min, 100% B; 17  
834 min, 100% B; 18 min, 0% B; 21 min 0% B. The method was transferred to XEVO TQ-S (Waters,  
835 Wilmslow, U.K.), using an Acquity UPLC system with 45 °C separation temperature.  
836 MS data were acquired according to the following parameters: capillary voltage, 0.8 kV; source  
837 offset, 50 V; desolvation temperature, 500°C; source temperature, 150°C; desolvation gas flow, 1000  
838 L/h; cone gas flow, 150 L/h; neutraliser gas, 7.0 bar; collision gas, 0.15 ml/min; cone voltage, 80 V.  
839 Data were acquired through an electrospray negative ionisation, focusing only on [M-H]<sup>-</sup> ions.  
840 Retention time (RT), multiple reaction monitoring (MRM) transitions and individually optimised  
841 collision energy (CE) are listed in supplementary table S2.

842

843 *Data processing.* The raw LC-MS data were analysed using Skyline [MacCoss Lab, (Adams *et al*,  
844 2020)]. External dilution curves were used to determine the range for linear response.

845

846 *Chemicals and reagents.* Metabolite standards (Mass Spectrometry Metabolite Library of Standards,  
847 MSMLS) were purchased from IROA Technologies (Michigan, MI, U.S.A.). Acetic acid, tributylamine  
848 (TBA), L-phenyl-d5-alanine, were obtained from Sigma-Aldrich (Gillingham, U.K.). LC-MS grade water,  
849 water with 0.1% formic acid (v/v) and acetonitrile with 0.1% formic acid (v/v) were purchased from  
850 Fisher Scientific (Leicester, U.K.). Methanol and isopropanol were purchased from Honeywell  
851 (Charlotte, NC, U.S.A.). AccQTag Ultra reagent was purchased from Waters UK.

852

### 853 **Statistical analysis**

854 Descriptive statistical analysis was applied for all the data presented in this work. Statistical  
855 significance was assessed by one-way analysis of variance (One-way ANOVA) using OriginPro 2018b  
856 (v. 9.55) (<http://www.originlab.com/>). Samples size was at least >4 for all the measurements  
857 collected in this work.

858

### 859 **Acknowledgments**

860 We acknowledge professor Enrique Flores from the institute of Plant Biochemistry and  
861 Photosynthesis, University of Sevilla (Sevilla, Spain), for kindly providing both the *Anabaena sp. PCC*  
862 *7120* wild-type (WT) and the KO strain for the *amt* gene cluster.

863 We also acknowledge help and support from Dr. Mark Bennett and Dr. Paul Hitchen with MRM-MS  
864 protein quantification, and from Dr. David Malatinszky for setting up high-throughput GS and  
865 ammonium quantification assays.

866 We thank Stephen Rothery (FILM) for help with image analysis also acknowledge the funding from  
867 the Wellcome Trust (grant 104931/Z/14/Z) and BBSRC (grant BB/L015129/1) which support the  
868 Facility for Imaging by Light Microscopy (FILM) at Imperial College London.

869

#### 870 **Funding**

871 We acknowledge funding from the BBSRC project BB/N003608/1.

872

#### 873 **Author's contribution**

874 GP and PJ, conception, design and writing of the manuscript. GP, experiments coordination, sample  
875 collection, data collection and analysis. TF, set up the method for MRM protein quantification and  
876 sample run. VSK, set up the method for metabolomic analysis and sample run. DG, set up ImageJ  
877 macro for microscope analysis. MC, sample preparation for metabolomic analysis. JB, metabolomic  
878 analysis coordination. All authors revised the manuscript and approved its final version.

879 **References**

- 880 Abbatiello SE, Mani DR, Schilling B, MacLean B, Zimmerman LJ, Feng X, Cusack MP, Sedransk N, Hall  
881 SC, Addona T, Allen S, Dodder NG, Ghosh M, Held JM, Hedrick V, Inerowicz HD, Jackson A,  
882 Keshishian H, Kim JW, Lyssand JS, et al (2013) Design, implementation and multisite evaluation  
883 of a system suitability protocol for the quantitative assessment of instrument performance in  
884 liquid chromatography-multiple reaction monitoring-MS (LC-MRM-MS). *Mol. Cell. Proteomics*  
885 **12**: 2623–2639
- 886 Adams DG, Bergman B, Nierzwicki-Bauer SA, Duggan PS, Rai AN & Schüßler A (2013) Cyanobacterial-  
887 plant symbioses. In *The Prokaryotes: Prokaryotic Biology and Symbiotic Associations* pp 359–  
888 400. Springer-Verlag Berlin Heidelberg
- 889 Adams DG & Duggan PS (2008) Cyanobacteria-bryophyte symbioses. *J. Exp. Bot.* **59**: 1047–1058  
890 Available at: <https://academic.oup.com/jxb/article-lookup/doi/10.1093/jxb/ern005> [Accessed  
891 January 16, 2020]
- 892 Adams KJ, Pratt B, Bose N, Dubois LG, St. John-Williams L, Perrott KM, Ky K, Kapahi P, Sharma V,  
893 Maccoss MJ, Moseley MA, Colton CA, Maclean BX, Schilling B & Thompson JW (2020) Skyline  
894 for Small Molecules: A Unifying Software Package for Quantitative Metabolomics. *J. Proteome*  
895 *Res.* **19**: 1447–1458 Available at: <https://pubmed.ncbi.nlm.nih.gov/31984744/> [Accessed July 6,  
896 2020]
- 897 Andrade SLA & Einsle O (2007) The Amt/Mep/Rh family of ammonium transport proteins (Review).  
898 *Mol. Membr. Biol.* **24**: 357–365 Available at:  
899 <http://www.tandfonline.com/doi/full/10.1080/09687680701388423> [Accessed February 7,  
900 2020]
- 901 Arcondeguy T, Jack R & Merrick M (2001) PII Signal Transduction Proteins, Pivotal Players in  
902 Microbial Nitrogen Control. *Microbiol. Mol. Biol. Rev.* **65**: 80–105
- 903 Backer R, Rokem JS, Ilangumaran G, Lamont J, Praslickova D, Ricci E, Subramanian S & Smith DL  
904 (2018) Plant growth-promoting rhizobacteria: Context, mechanisms of action, and roadmap to  
905 commercialization of biostimulants for sustainable agriculture. *Front. Plant Sci.* **871**:
- 906 Bird C & Wyman M (2003) Nitrate/Nitrite Assimilation System of the Marine Picoplanktonic  
907 Cyanobacterium *Synechococcus* sp. Strain WH 8103: Effect of Nitrogen Source and Availability  
908 on Gene Expression. *Appl. Environ. Microbiol.* **69**: 7009–7018
- 909 Böhme H (1998) Regulation of nitrogen fixation in heterocyst-forming cyanobacteria. *Trends Plant*  
910 *Sci.* **3**: 346–351
- 911 Bolay P, Muro-Pastor MI, Florencio FJ & Klähn S (2018) The distinctive regulation of cyanobacterial  
912 glutamine synthetase. *Life* **8**:
- 913 Boogerd FC, Ma H, Bruggeman FJ, Van Heeswijk WC, García-Contreras R, Molenaar D, Krab K &  
914 Westerhoff H V. (2011) AmtB-mediated NH<sub>3</sub> transport in prokaryotes must be active and as a  
915 consequence regulation of transport by GlnK is mandatory to limit futile cycling of NH<sub>4</sub><sup>+</sup>/NH<sub>3</sub>.  
916 *FEBS Lett.* **585**: 23–28
- 917 Bressler SL & Ahmed SI (1984) Detection of glutamine synthetase activity in marine phytoplankton:  
918 optimization of the biosynthetic assay. *Mar. Ecol. Prog. Ser.* **14**: 207–217
- 919 Burnat M, Herrero A & Flores E (2014) Compartmentalized cyanophycin metabolism in the  
920 diazotrophic filaments of a heterocyst-forming cyanobacterium. *Proc. Natl. Acad. Sci. U. S. A.*  
921 **111**: 3823–3828
- 922 Cameron JC & Pakrasi HB (2010) Essential role of glutathione in acclimation to environmental and  
923 redox perturbations in the cyanobacterium *Synechocystis* sp. PCC 6803. *Plant Physiol.* **154**:  
924 1672–1685



- 925 Cardona T & Magnuson A (2010) Excitation energy transfer to Photosystem I in filaments and  
926 heterocysts of *Nostoc punctiforme*. *Biochim. Biophys. Acta - Bioenerg.* **1797**: 425–433
- 927 Christensen DG, Xie X, Basisty N, Byrnes J, McSweeney S, Schilling B & Wolfe AJ (2019) Post-  
928 translational Protein Acetylation: An elegant mechanism for bacteria to dynamically regulate  
929 metabolic functions. *Front. Microbiol.* **10**:
- 930 Cumino AC, Marcozzi C, Barreiro R & Salerno GL (2007) Carbon cycling in *Anabaena* sp. PCC 7120.  
931 Sucrose synthesis in the heterocysts and possible role in nitrogen fixation. *Plant Physiol.* **143**:  
932 1385–1397
- 933 Eisenhut M, Huege J, Schwarz D, Bauwe H, Kopka J & Hagemann M (2008) Metabolome phenotyping  
934 of inorganic carbon limitation in cells of the wild type and photorespiratory mutants of the  
935 cyanobacterium *Synechocystis* sp. strain PCC 6803. *Plant Physiol.* **148**: 2109–2120
- 936 Ermakova M, Battchikova N, Richaud P, Leino H, Kosourov S, Isojärvi J, Peltier G, Flores E, Cournac L,  
937 Allahverdiyeva Y & Aro EM (2014) Heterocyst-specific flavodiiron protein Flv3B enables oxic  
938 diazotrophic growth of the filamentous cyanobacterium *Anabaena* sp. PCC 7120. *Proc. Natl.*  
939 *Acad. Sci. U. S. A.* **111**: 11205–11210
- 940 Flores E & Herrero A (2005) Nitrogen assimilation and nitrogen control in cyanobacteria. In  
941 *Biochemical Society Transactions* pp 164–167.
- 942 Forcada-Nadal A, Llácer JL, Contreras A, Marco-Marín C & Rubio V (2018) The PII-NAGK-PipX-NtcA  
943 regulatory axis of cyanobacteria: A tale of changing partners, allosteric effectors and non-  
944 covalent interactions. *Front. Mol. Biosci.* **5**:
- 945 Forchhammer K (2004) Global carbon/nitrogen control by PII signal transduction in cyanobacteria:  
946 From signals to targets. *FEMS Microbiol. Rev.* **28**: 319–333
- 947 Forchhammer K (2008) PII signal transducers: novel functional and structural insights. *Trends*  
948 *Microbiol.* **16**: 65–72
- 949 Forchhammer K & De Marsac NT (1995) Functional analysis of the phosphoprotein P(II) (glnB gene  
950 product) in the cyanobacterium *Synechococcus* sp. strain PCC 7942. *J. Bacteriol.* **177**: 2033–  
951 2040
- 952 Forchhammer K & Selim KA (2019) Carbon/Nitrogen Homeostasis Control in Cyanobacteria. *FEMS*  
953 *Microbiol. Rev.*
- 954 Forchhammer K & Watzer B (2016) Closing a gap in cyanophycin metabolism. *Microbiol. (United*  
955 *Kingdom)* **162**: 727–729
- 956 Galmozzi C V., Saelices L, Florencio FJ & Muro-Pastor MI (2010) Posttranscriptional regulation of  
957 glutamine synthetase in the filamentous cyanobacterium *Anabaena* sp. PCC 7120: Differential  
958 expression between vegetative cells and heterocysts. *J. Bacteriol.* **192**: 4701–4711
- 959 Giordano M (2013) Homeostasis: An underestimated focal point of ecology and evolution. *Plant Sci.*  
960 **211**: 92–101
- 961 Golden JW & Yoon HS (1998) Heterocyst formation in *Anabaena*. *Curr. Opin. Microbiol.* **1**: 623–629
- 962 Gray N, Zia R, King A, Patel VC, Wendon J, McPhail MJW, Coen M, Plumb RS, Wilson ID & Nicholson  
963 JK (2017) High-Speed Quantitative UPLC-MS Analysis of Multiple Amines in Human Plasma and  
964 Serum via Precolumn Derivatization with 6-Aminoquinolyl-N-hydroxysuccinimidyl Carbamate:  
965 Application to Acetaminophen-Induced Liver Failure. *Anal. Chem.* **89**: 2478–2487
- 966 Herrero A, Muro-Pastor AM & Flores E (2001) Nitrogen control in cyanobacteria. *J. Bacteriol.* **183**:  
967 411–425
- 968 Herrero A, Stavans J & Flores E (2016) The multicellular nature of filamentous heterocyst-forming  
969 cyanobacteria. *FEMS Microbiol. Rev.* **40**: 831–854
- 970 Huergo LF & Dixon R (2015) The Emergence of 2-Oxoglutarate as a Master Regulator Metabolite.

- 971 *Microbiol. Mol. Biol. Rev.* **79**: 419–35 Available at:  
972 <http://www.ncbi.nlm.nih.gov/pubmed/26424716> [Accessed February 10, 2020]
- 973 Inomura K, Bragg J & Follows MJ (2017) A quantitative analysis of the direct and indirect costs of  
974 nitrogen fixation: A model based on *Azotobacter vinelandii*. *ISME J.* **11**: 166–175
- 975 Ito T, Tokoro M, Hori R, Hemmi H & Yoshimura T (2018) Production of ophthalmic acid using  
976 engineered *Escherichia coli*. *Appl. Environ. Microbiol.* **84**:  
977 Javelle A, Lupo D, Li XD, Merrick M, Chami M, Ripoche P & Winkler FK (2007) Structural and  
978 mechanistic aspects of Amt/Rh proteins. *J. Struct. Biol.* **158**: 472–481
- 979 Kellar PE & Goldman CR (1979) A comparative study of nitrogen fixation by the *Anabaena*-*Azolla*  
980 symbiosis and free-living populations of *Anabaena* spp. in Lake Ngahawa, New Zealand.  
981 *Oecologia* **43**: 269–281
- 982 Kumar K, Mella-Herrera RA & Golden JW (2010) Cyanobacterial heterocysts. *Cold Spring Harb.*  
983 *Perspect. Biol.* **2**:  
984 Lechno-Yossef S & Nierzwicki-Bauer SA (2005) *Azolla*-*Anabaena* Symbiosis. In *Cyanobacteria in*  
985 *Symbiosis* pp 153–178. Kluwer Academic Publishers
- 986 Ludewig U (2006) Ion transport versus gas conduction: function of AMT/Rh-type proteins. *Transfus.*  
987 *Clin. Biol.* **13**: 111–116
- 988 Ludewig U, Neuhäuser B & Dynowski M (2007) Molecular mechanisms of ammonium transport and  
989 accumulation in plants. *FEBS Lett.* **581**: 2301–2308
- 990 MacLean B, Tomazela DM, Abbatiello SE, Zhang S, Whiteaker JR, Paulovich AG, Carr SA & MacCoss  
991 MJ (2010) Effect of collision energy optimization on the measurement of peptides by selected  
992 reaction monitoring (SRM) mass spectrometry. *Anal. Chem.* **82**: 10116–10124
- 993 Malatinszky D, Steuer R & Jones PR (2017) A comprehensively curated genome-scale two-cell model  
994 for the heterocystous cyanobacterium *Anabaena* sp. PCC 7120. *Plant Physiol.* **173**: 509–523
- 995 Martín-Figueroa E, Navarro F & Florencio FJ (2000) The GS-GOGAT pathway is not operative in the  
996 heterocysts. Cloning and expression of *glsF* gene from the cyanobacterium *Anabaena* sp. PCC  
997 7120. *FEBS Lett.* **476**: 282–286
- 998 Maxwell K & Johnson GN (2000) Chlorophyll fluorescence—a practical guide. *J. Exp. Bot.* **51**: 659–668  
999 Available at: <https://academic.oup.com/jxb/article-lookup/doi/10.1093/jexbot/51.345.659>  
1000 [Accessed December 12, 2019]
- 1001 Merida A, Candau P & Florencio FJ (1991) Regulation of glutamine synthetase activity in the  
1002 unicellular cyanobacterium *Synechocystis* sp. strain PCC 6803 by the nitrogen source: Effect of  
1003 ammonium. *J. Bacteriol.* **173**: 4095–4100
- 1004 Messineo L (1966) Modification of the Sakaguchi reaction: Spectrophotometric determination of  
1005 arginine in proteins without previous hydrolysis. *Arch. Biochem. Biophys.* **117**: 534–540
- 1006 Michopoulos F (2018) Ion pair chromatography for endogenous metabolites LC-MS analysis in tissue  
1007 samples following targeted acquisition. In *Methods in Molecular Biology* pp 83–97. Humana  
1008 Press Inc.
- 1009 Mo R, Yang M, Chen Z, Cheng Z, Yi X, Li C, He C, Xiong Q, Chen H, Wang Q & Ge F (2015) Acetylome  
1010 analysis reveals the involvement of lysine acetylation in photosynthesis and carbon metabolism  
1011 in the model cyanobacterium *synechocystis* sp. PCC 6803. *J. Proteome Res.* **14**: 1275–1286  
1012 Available at: <https://pubmed.ncbi.nlm.nih.gov/25621733/> [Accessed July 6, 2020]
- 1013 Montesinos ML, Herrero A & Flores E (1997) Amino acid transport in taxonomically diverse  
1014 cyanobacteria and identification of two genes encoding elements of a neutral amino acid  
1015 permease putatively involved in recapture of leaked hydrophobic amino acids. *J. Bacteriol.* **179**:  
1016 853–862

- 1017 Montesinos ML, Muro-Pastor AM, Herrero A & Flores E (1998) Ammonium/methylammonium  
1018 permeases of a cyanobacterium: Identification and analysis of three nitrogen-regulated amt  
1019 genes in *Synechocystis* sp. PCC 6803. *J. Biol. Chem.* **273**: 31463–31470
- 1020 Mullineaux CW, Mariscal V, Nenninger A, Khanum H, Herrero A, Flores E & Adams DG (2008)  
1021 Mechanism of intercellular molecular exchange in heterocyst-forming cyanobacteria. *EMBO J.*  
1022 **27**: 1299–1308
- 1023 Muro-Pastor MI, Reyes JC, Florencio FJ, Vespucio A & Florencio FJ (2001) CYANOBACTERIA PERCEIVE  
1024 NITROGEN STATUS BY SENSING INTRACELLULAR 2-OXOGLUTARATE LEVELS Downloaded from  
1025 JBC Papers in Press Available at: <http://www.jbc.org/> [Accessed February 11, 2020]
- 1026 Nakayasu ES, Burnet MC, Walukiewicz HE, Wilkins CS, Shukla AK, Brooks S, Plutz MJ, Lee BD, Schilling  
1027 B, Wolfe AJ, Müller S, Kirby JR, Rao C V., Cort JR & Payne SH (2017) Ancient regulatory role of  
1028 lysine acetylation in central metabolism. *MBio* **8**:
- 1029 Narainsamy K, Farci S, Braun E, Junot C, Cassier-Chauvat C & Chauvat F (2016) Oxidative-stress  
1030 detoxification and signalling in cyanobacteria: The crucial glutathione synthesis pathway  
1031 supports the production of ergothioneine and ophthalmate. *Mol. Microbiol.* **100**: 15–24
- 1032 Nicolaisen K, Hahn A & Schleiff E (2009) The cell wall in heterocyst formation by *Anabaena* sp. PCC  
1033 7120. *J. Basic Microbiol.* **49**: 5–24
- 1034 Nürnberg DJ, Mariscal V, Bornikoel J, Nieves-Mori6n M, Krauß N, Herrero A, Maldener I, Flores E &  
1035 Mullineaux CW (2015) Intercellular diffusion of a fluorescent sucrose analog via the septal  
1036 junctions in a filamentous cyanobacterium. *MBio* **6**:
- 1037 Omata T, Andriess X & Hirano A (1993) Identification and characterization of a gene cluster  
1038 involved in nitrate transport in the cyanobacterium *Synechococcus* sp. PCC7942. *Mol. Gen.*  
1039 *Genet.* **236**: 193–202 Available at: <http://www.ncbi.nlm.nih.gov/pubmed/8437564> [Accessed  
1040 January 20, 2020]
- 1041 Orrs J, Keefery LM, Keiml P, Dinh Nguyen\$ T, Wellem\$ T, Heinrichsonl RL & Haselkom\$ \$ R (1981)  
1042 Purification, Physical Characterization, and NH<sub>2</sub>-terminal Sequence of Glutamine Synthetase  
1043 from the Cyanobacterium *Anabaena* 7120"
- 1044 Paz-Yepes J, Merino-Puerto V, Herrero A & Flores E (2008) The amt gene cluster of the heterocyst-  
1045 forming cyanobacterium *Anabaena* sp. strain PCC 7120. *J. Bacteriol.* **190**: 6535–6539
- 1046 Percival SL & Williams DW (2013) Cyanobacteria. In *Microbiology of Waterborne Diseases:*  
1047 *Microbiological Aspects and Risks: Second Edition* pp 79–88. Elsevier Ltd.
- 1048 Perin G, Bellan A, Segalla A, Meneghesso A, Alboresi A & Morosinotto T (2015) Generation of  
1049 random mutants to improve light-use efficiency of *Nannochloropsis gaditana* cultures for  
1050 biofuel production. *Biotechnol. Biofuels* **8**:
- 1051 Perin G, Yunus IS, Valton M, Alobwede E & Jones PR (2019) Sunlight-driven recycling to increase  
1052 nutrient use-efficiency in agriculture. *Algal Res.* **41**: 101554
- 1053 Picossi S, Montesinos ML, Pernil R, Lichtlé C, Herrero A & Flores E (2005) ABC-type neutral amino  
1054 acid permease N-I is required for optimal diazotrophic growth and is repressed in the  
1055 heterocysts of *Anabaena* sp. strain PCC 7120. *Mol. Microbiol.* **57**: 1582–1592
- 1056 Rascio N & La Rocca N (2013) Biological Nitrogen Fixation. In *Reference Module in Earth Systems and*  
1057 *Environmental Sciences* Elsevier Available at:  
1058 <https://linkinghub.elsevier.com/retrieve/pii/B9780124095489006850> [Accessed January 16,  
1059 2020]
- 1060 Reitzer L (2003) Nitrogen Assimilation and Global Regulation in *Escherichia coli* . *Annu. Rev.*  
1061 *Microbiol.* **57**: 155–176
- 1062 Rippka R, Deruelles J & Waterbury JB (1979) Generic assignments, strain histories and properties of

- 1063 pure cultures of cyanobacteria. *J. Gen. Microbiol.* **111**: 1–61
- 1064 Ritchie RJ (2006) Consistent sets of spectrophotometric chlorophyll equations for acetone, methanol  
1065 and ethanol solvents. *Photosynth. Res.* **89**: 27–41
- 1066 Robinson C (2017) Phytoplankton Biogeochemical Cycles. In *Marine Plankton: A Practical Guide to*  
1067 *Ecology, Methodology, and Taxonomy*, Castellani C & Edwards M (eds) pp 42–52. Oxford  
1068 University Press Available at:  
1069 <https://books.google.co.uk/books?id=NuUWDgAAQBAJ&pg=PA47&pg=PA47&dq=ammonia+th>  
1070 [e+most+energetically+favorable+AND+source&source=bl&ots=xOjWZgkiLw&sig=ACfU3U2\\_3N](https://books.google.co.uk/books?id=NuUWDgAAQBAJ&pg=PA47&pg=PA47&dq=ammonia+the+most+energetically+favorable+AND+source&source=bl&ots=xOjWZgkiLw&sig=ACfU3U2_3N4PK9NlKmgjtVs0EyMkH8nfeA&hl=en&sa=X&ved=2ahUKEwiLt7GakZfnAhUYRhUIHeDGDa0Q6AEwCXoECAkQAQ#v=onepa)  
1071 [4PK9NlKmgjtVs0EyMkH8nfeA&hl=en&sa=X&ved=2ahUKEwiLt7GakZfnAhUYRhUIHeDGDa0Q6A](https://books.google.co.uk/books?id=NuUWDgAAQBAJ&pg=PA47&pg=PA47&dq=ammonia+the+most+energetically+favorable+AND+source&source=bl&ots=xOjWZgkiLw&sig=ACfU3U2_3N4PK9NlKmgjtVs0EyMkH8nfeA&hl=en&sa=X&ved=2ahUKEwiLt7GakZfnAhUYRhUIHeDGDa0Q6AEwCXoECAkQAQ#v=onepa)  
1072 [EwCXoECAkQAQ#v=onepa](https://books.google.co.uk/books?id=NuUWDgAAQBAJ&pg=PA47&pg=PA47&dq=ammonia+the+most+energetically+favorable+AND+source&source=bl&ots=xOjWZgkiLw&sig=ACfU3U2_3N4PK9NlKmgjtVs0EyMkH8nfeA&hl=en&sa=X&ved=2ahUKEwiLt7GakZfnAhUYRhUIHeDGDa0Q6AEwCXoECAkQAQ#v=onepa) [Accessed January 22, 2020]
- 1073 Sinetova MA, Červený J, Zavřel T & Nedbal L (2012) On the dynamics and constraints of batch culture  
1074 growth of the cyanobacterium *Cyanothece* sp. ATCC 51142. *J. Biotechnol.* **162**: 148–155
- 1075 Singh SP & Montgomery BL (2011) Determining cell shape: Adaptive regulation of cyanobacterial  
1076 cellular differentiation and morphology. *Trends Microbiol.* **19**: 278–285
- 1077 Valladares A, Maldener I, Muro-Pastor AM, Flores E & Herrero A (2007) Heterocyst development and  
1078 diazotrophic metabolism in terminal respiratory oxidase mutants of the cyanobacterium  
1079 *Anabaena* sp. strain PCC 7120. *J. Bacteriol.* **189**: 4425–4430
- 1080 Valladares A, Montesinos ML, Herrero A & Flores E (2002) An ABC-type, high-affinity urea permease  
1081 identified in cyanobacteria. *Mol. Microbiol.* **43**: 703–715
- 1082 Valladares A, Rodríguez V, Camargo S, Martínez-Noël GMA, Herrero A & Luque I (2011) Specific role  
1083 of the cyanobacterial pipX factor in the heterocysts of *Anabaena* sp. strain PCC 7120. *J.*  
1084 *Bacteriol.* **193**: 1172–1182
- 1085 Wang S, Orabi EA, Baday S, Bernèche S & Lamoureux G (2012) Ammonium Transporters Achieve  
1086 Charge Transfer by Fragmenting Their Substrate. *J. Am. Chem. Soc.* **134**: 10419–10427 Available  
1087 at: <https://pubs.acs.org/doi/10.1021/ja300129x> [Accessed February 7, 2020]
- 1088 Watzer B, Engelbrecht A, Hauf W, Stahl M, Maldener I & Forchhammer K (2015) Metabolic pathway  
1089 engineering using the central signal processor PII. *Microb. Cell Fact.* **14**:
- 1090 Watzer B & Forchhammer K (2018) Cyanophycin synthesis optimizes nitrogen utilization in the  
1091 unicellular cyanobacterium *Synechocystis* sp. strain PCC 6803. *Appl. Environ. Microbiol.* **84**:
- 1092 Watzer B, Spät P, Neumann N, Koch M, Sobotka R, Macek B, Hennrich O & Forchhammer K (2019)  
1093 The Signal Transduction Protein PII Controls Ammonium, Nitrate and Urea Uptake in  
1094 Cyanobacteria. *Front. Microbiol.* **10**: Available at:  
1095 <https://www.frontiersin.org/article/10.3389/fmicb.2019.01428/full> [Accessed February 3,  
1096 2020]
- 1097 Wellburn AR (1994) The Spectral Determination of Chlorophylls a and b, as well as Total Carotenoids,  
1098 Using Various Solvents with Spectrophotometers of Different Resolution. *J. Plant Physiol.* **144**:  
1099 307–313
- 1100 Willis RB, Montgomery ME & Allen PR (1996) Improved Method for Manual, Colorimetric  
1101 Determination of Total Kjeldahl Nitrogen Using Salicylate. *J. Agric. Food Chem.* **44**: 1804–1807  
1102 Available at: <https://pubs.acs.org/doi/10.1021/jf950522b> [Accessed December 10, 2019]
- 1103 Yakunin AF & Hallenbeck PC (2002) AmtB is necessary for NH<sub>4</sub><sup>+</sup>-induced nitrogenase switch-off and  
1104 ADP-ribosylation in *Rhodobacter capsulatus*. *J. Bacteriol.* **184**: 4081–4088
- 1105 Zhang CC, Zhou CZ, Burnap RL & Peng L (2018) Carbon/Nitrogen Metabolic Balance: Lessons from  
1106 Cyanobacteria. *Trends Plant Sci.* **23**: 1116–1130  
1107
